# Supplementary material for: In silico characterization of microRNAs-like sequences in the genome of Paracoccidioides brasiliensis
Source: PubMed Central journal article supplement (PMC6428129; doi:10.1590/1678-4685-gmb-2018-0014), 2019-02-14
Supplement: 1415-4757-GMB-1678-4685-GMB-2018-0014-s001.pdf [file 1415-4757-GMB-1678-4685-GMB-2018-0014-s001.pdf]

## Supplementary Material “*In silico* characterization of microRNAs-like sequences in the genome of *Paracoccidioides brasiliensis*”

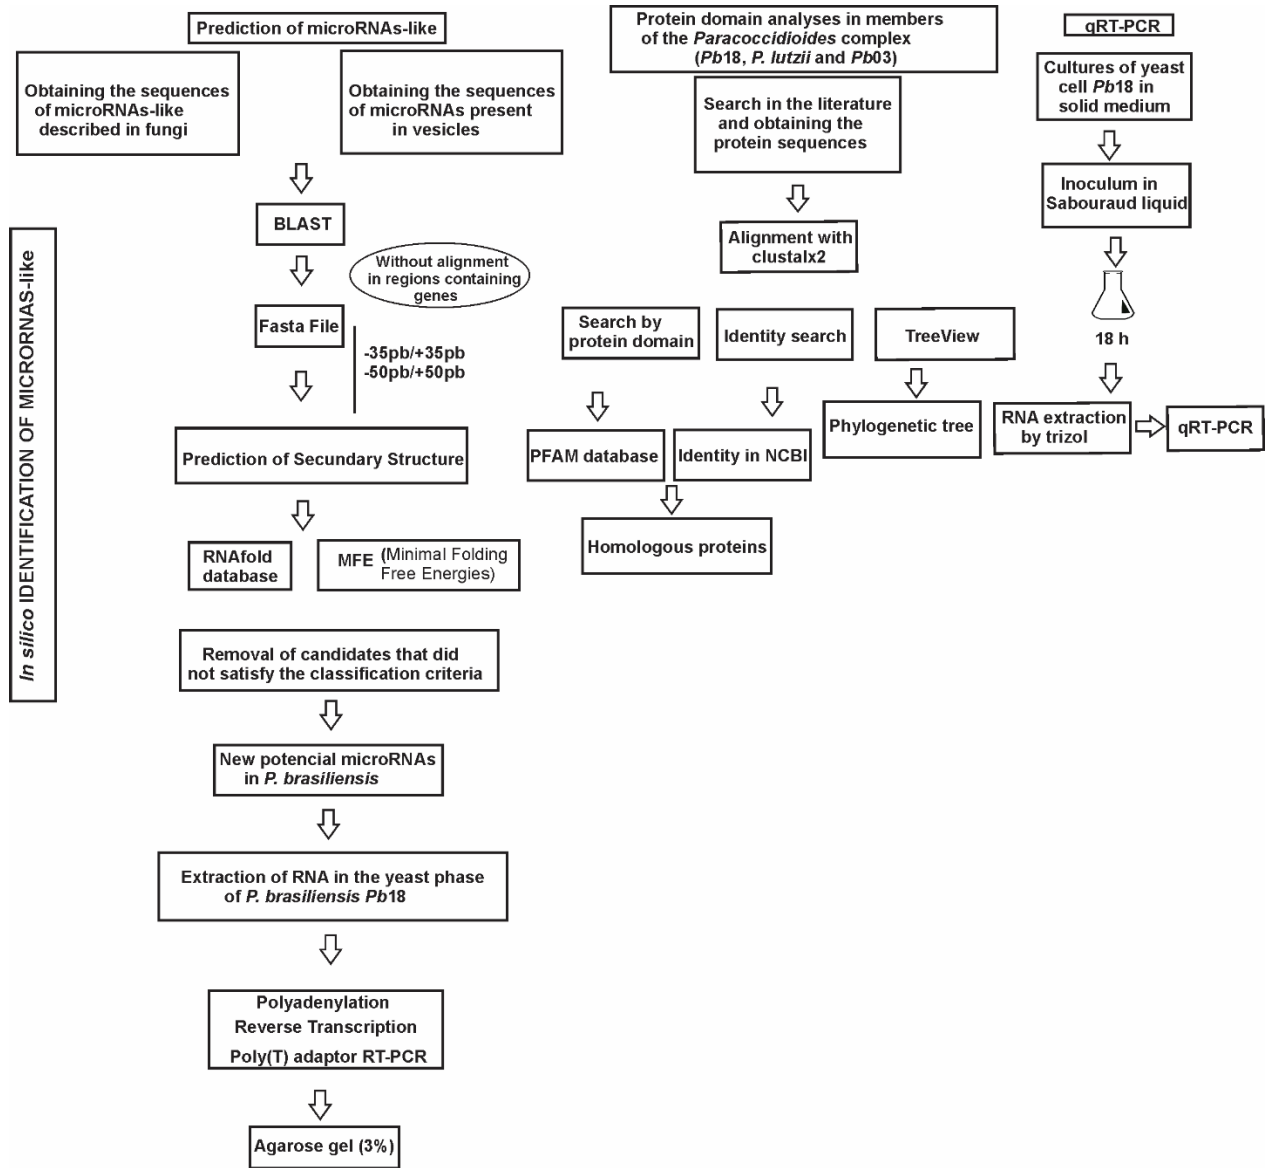

Figure S1 - Flowchart of study design used for the prediction of miRNAs-like in the genome of *P. brasiliensis*.
