# Supplementary material for: In silico characterization of microRNAs-like sequences in the genome of Paracoccidioides brasiliensis
Source: PubMed Central journal article supplement (PMC6428129; doi:10.1590/1678-4685-gmb-2018-0014), 2019-02-14
Supplement: 1415-4757-GMB-1678-4685-GMB-2018-0014-s002.pdf [file 1415-4757-GMB-1678-4685-GMB-2018-0014-s002.pdf]

## Supplementary Material “*In silico* characterization of microRNAs-like sequences in the genome of *Paracoccidioides brasiliensis*”

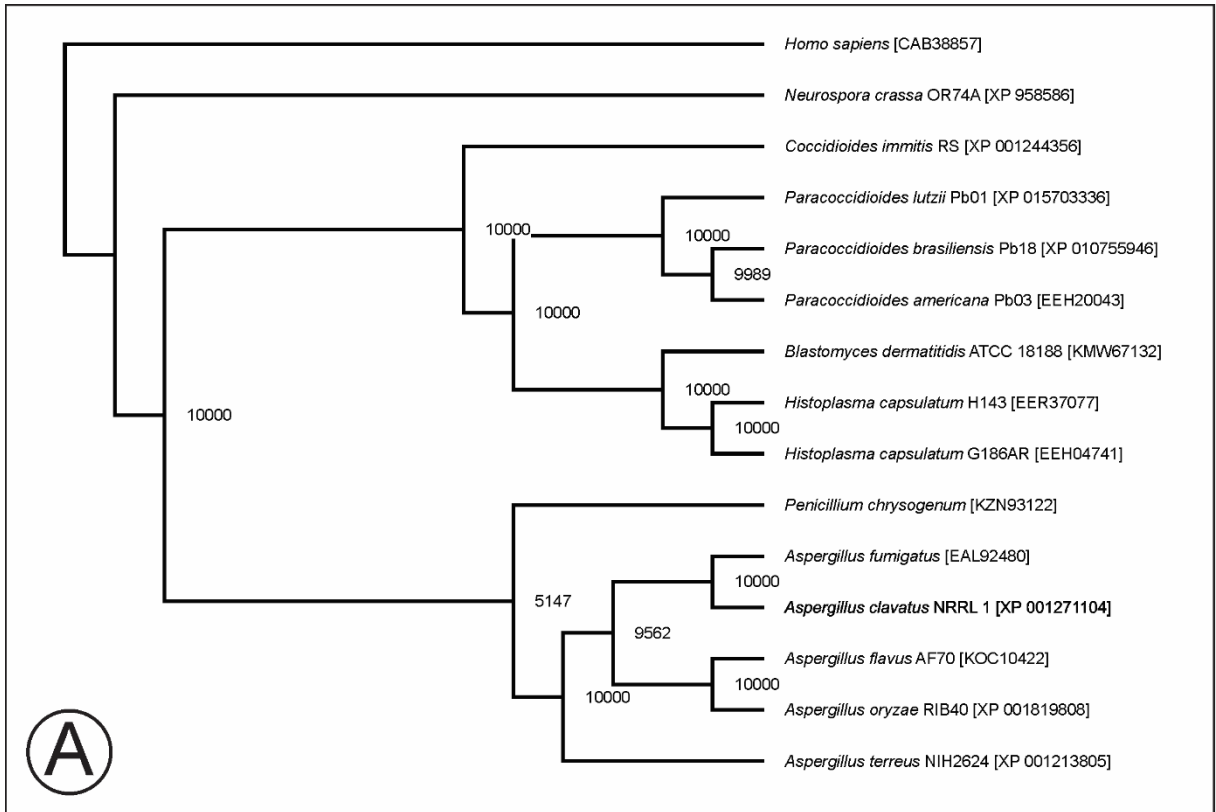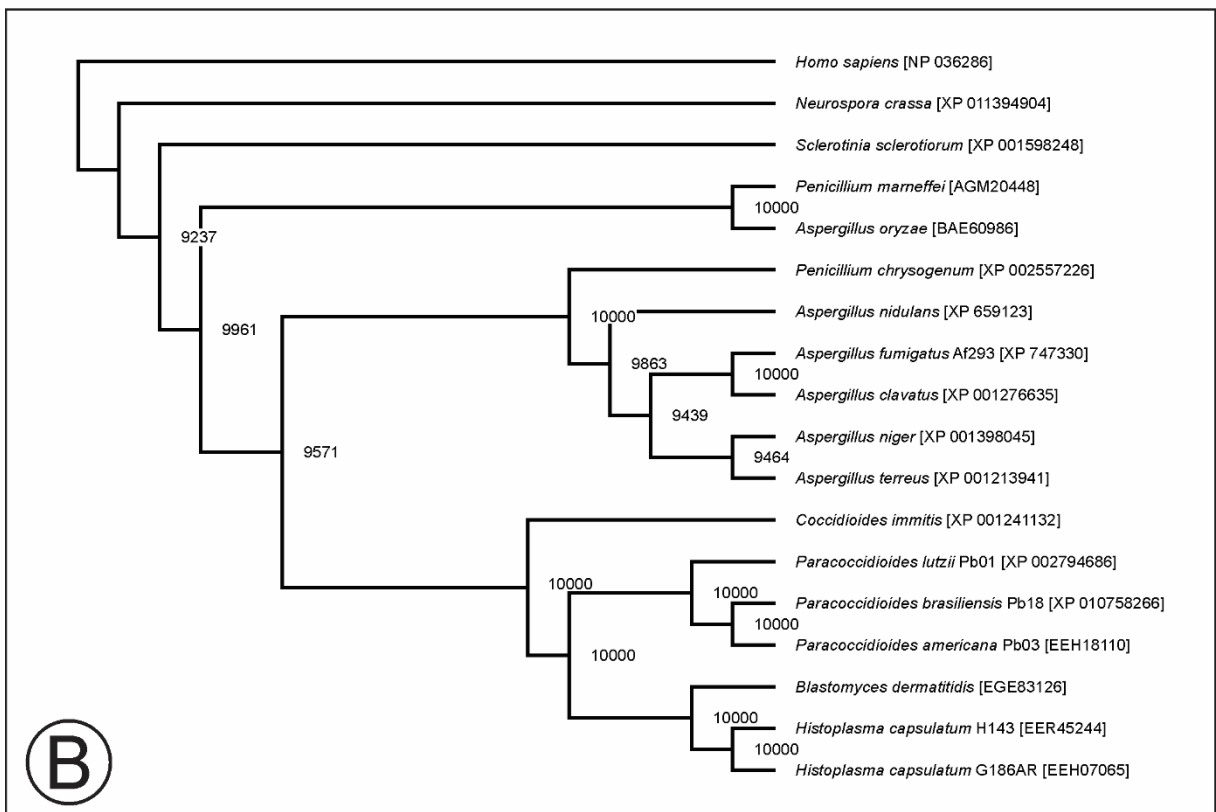

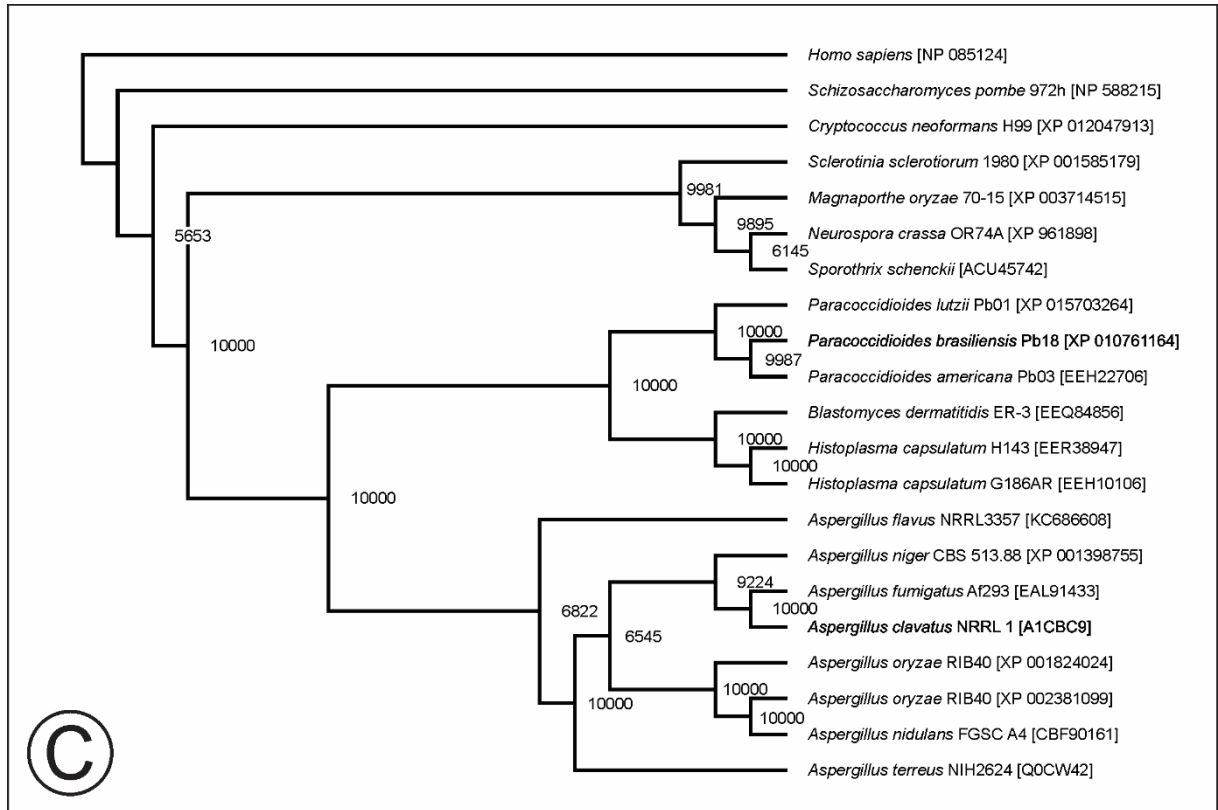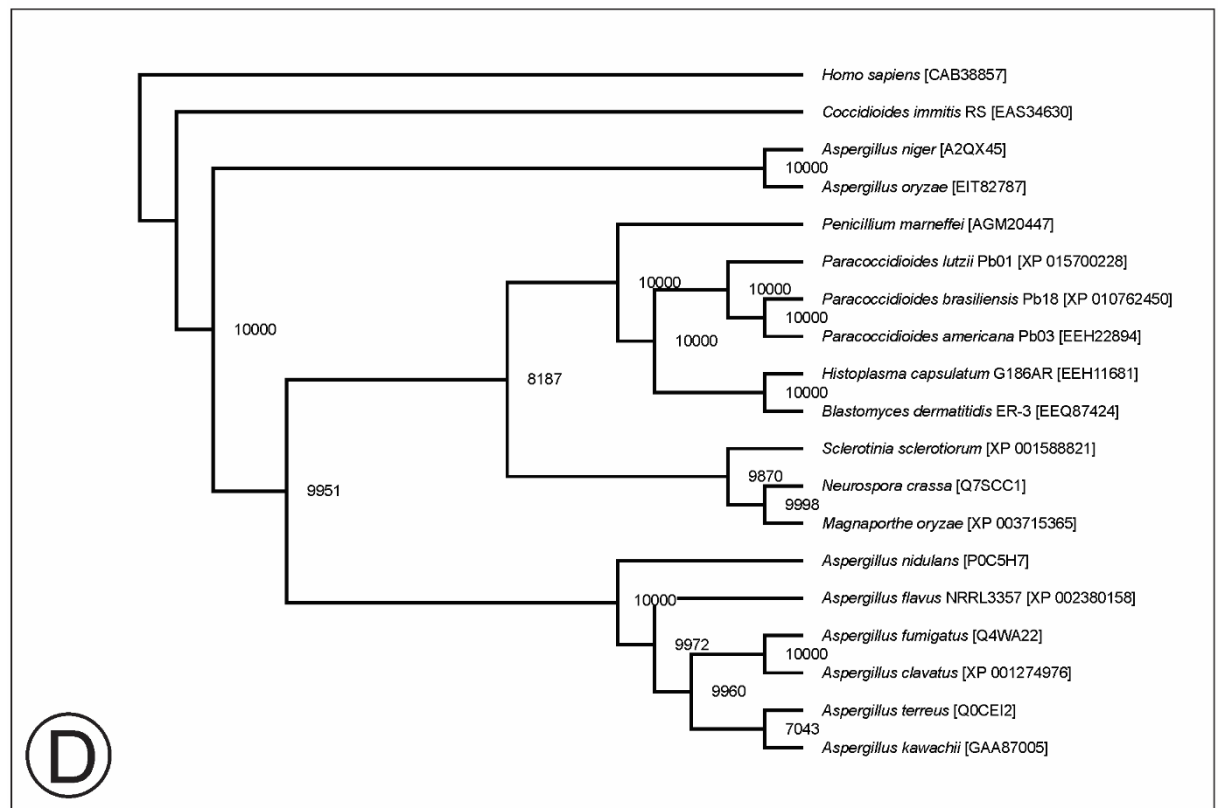

**Figure S2** - Phylogenetic tree of the dicer and argonaute proteins from *P. brasiliensis* (Pb18), *P. americana* (Pb03) and *P. lutzii* (Pb01). (A) Argonaute-1p; (B) Argonaute-2p; (C) Dicer-1p; (D) Dicer-2p. The Phylogenetic tree was constructed by multiple sequence alignments using CLUSTALX2 and was generated by neighbor-joining method.
