# Supplementary material for: In silico characterization of microRNAs-like sequences in the genome of Paracoccidioides brasiliensis
Source: PubMed Central journal article supplement (PMC6428129; doi:10.1590/1678-4685-gmb-2018-0014), 2019-02-14
Supplement: 1415-4757-GMB-1678-4685-GMB-2018-0014-s003.pdf [file 1415-4757-GMB-1678-4685-GMB-2018-0014-s003.pdf]

**Supplementary Material “*In silico* characterization of microRNAs-like sequences in the genome of *Paracoccidioides brasiliensis*”**

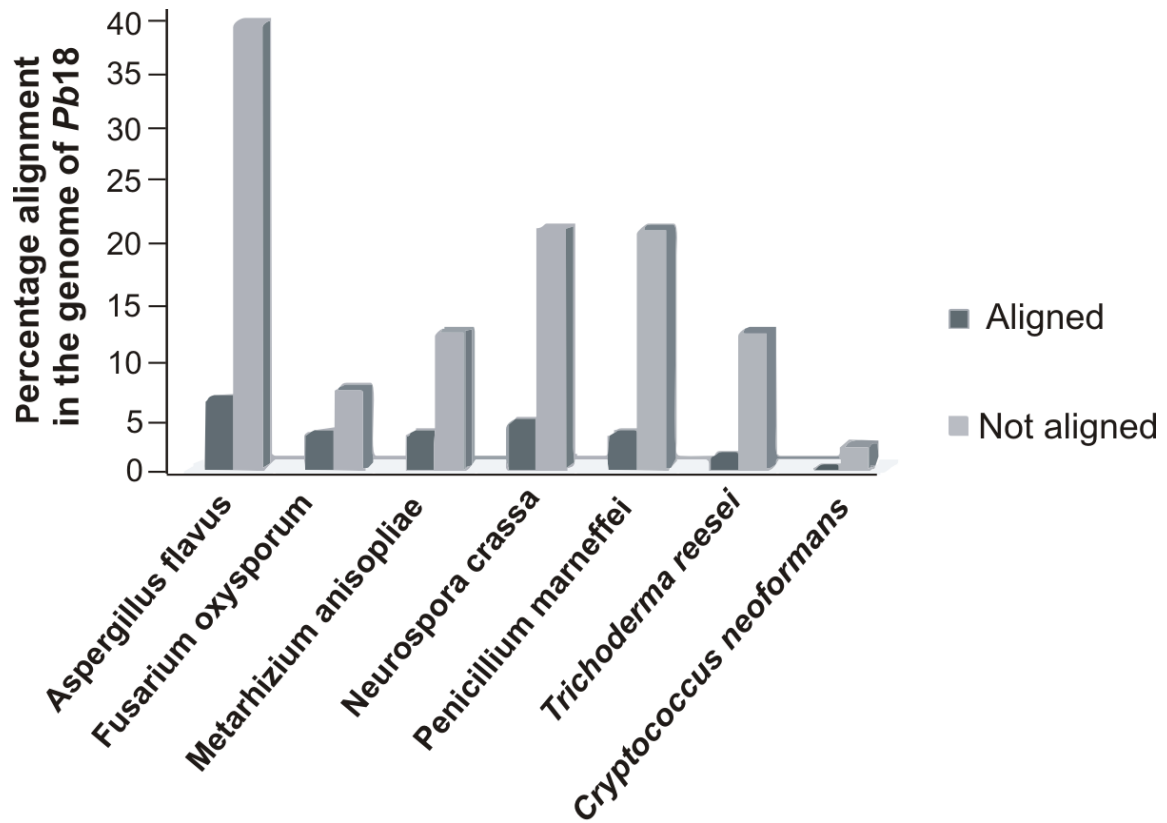

**Figure S3** - Alignment analysis of miRNAs-like in the genome of *P. brasiliensis*. MiRNAs-like described in fungi demonstrated identity to regions of the *P. brasiliensis* *Pb18* genome. The dark gray bars represent the percentage of miRNAs-like aligned in the genome of *P. brasiliensis* and light gray bars demonstrate the percentage of miRNAs-like that did not align to the *Pb18* genome.
