# Supplementary material for: In silico characterization of microRNAs-like sequences in the genome of Paracoccidioides brasiliensis
Source: PubMed Central journal article supplement (PMC6428129; doi:10.1590/1678-4685-gmb-2018-0014), 2019-02-14
Supplement: 1415-4757-GMB-1678-4685-GMB-2018-0014-s004.pdf [file 1415-4757-GMB-1678-4685-GMB-2018-0014-s004.pdf]

## Supplementary Material “*In silico* characterization of microRNAs-like sequences in the genome of *Paracoccidioides brasiliensis*”

**Table S1** - Access numbers of the proteins used to construct the phylogenetic trees.

|                                           | Access number  |                |                |              |
|-------------------------------------------|----------------|----------------|----------------|--------------|
|                                           | Argonaute 1    | Argonaute 2    | Dicer 1        | Dicer 2      |
| <i>Aspergillus clavatus</i> NRRL1         | -              | ACLA_058710    | ACLA_014840    | ACLA_055980  |
| <i>Aspergillus flavus</i> AF70            | -              | -              | KC686608       | AFLA_066400  |
| <i>Aspergillus fumigatus</i>              | AFUA_3G11010   | AFUA_8G05280   | AFUA_5G11790   | AFUA_4G02930 |
| <i>Aspergillus kawachii</i>               | -              | -              | -              | AKAW_05119   |
| <i>Aspergillus nidulans</i>               | -              | ANIA_01519     | ANIA_00119     | PDIP_77770   |
| <i>Aspergillus niger</i>                  | -              | ANI_1_1958144  | ANI_1_424164   | -            |
| <i>Aspergillus oryzae</i> RIB40           | AO090003000654 | AO090012000881 | AO090120000355 | Ao3042_00077 |
| <i>Aspergillus terreus</i> NIH2624        | ATEG_04627     | ATEG_04763     | ATEG_02092     | ATEG_07902   |
| <i>Blastomyces dermatitidis</i> ATCC      | BDDG_11934     | BDDG_06070     | BDCG_08125     | BDCG_02544   |
| <i>Coccidioides immitis</i> RS            | CIMG_03797     | CIMG_08296     | -              | CIMG_05654   |
| <i>Cryptococcus neoformans</i> H99        | -              | -              | CNAG_02745     | -            |
| <i>Histoplasma capsulatum</i> G186AR      | HCBG_06692     | HCBG_03944     | HCBG_01751     | HCBG_01136   |
| <i>Histoplasma capsulatum</i> H143        | HCDG_08528     | HCDG_00823     | HCDG_06891     | -            |
| <i>Magnaporthe oryzae</i> 70-15           | -              | -              | MGG_01541      | MGG_12357    |
| <i>Neurospora crassa</i> OR74A            | NCU06838       | NCU08389       | NCU08270       | NCU06766     |
| <i>Paracoccidioides brasiliensis</i> Pb01 | PAAG_11422     | PAAG_03231     | PAAG_11489     | PAAG_00072   |
| <i>Paracoccidioides brasiliensis</i> Pb03 | PADG_02302     | PABG_00673     | PABG_04917     | PABG_05105   |
| <i>Paracoccidioides brasiliensis</i> Pb18 | PADG_00716     | PADG_03108     | PADG_11946     | PADG_07189   |
| <i>Penicillium chrysogenum</i>            | EN45_032900    | PC12G03410     | -              | -            |
| <i>Penicillium marneffei</i>              | -              | AGM20448       | -              | -            |
| <i>Sclerotinia sclerotiorum</i>           | -              | SS1G_00384     | SS1G_13747     | SS1G_10419   |
| <i>Schizosaccharomyces pombe</i> 972h     | -              | -              | SPCC188.13c    | -            |
| <i>Sporothrix schenckii</i>               | -              | -              | C8CK81_SPOSC   | -            |
