# Supplementary material for: In silico characterization of microRNAs-like sequences in the genome of Paracoccidioides brasiliensis
Source: PubMed Central journal article supplement (PMC6428129; doi:10.1590/1678-4685-gmb-2018-0014), 2019-02-14
Supplement: 1415-4757-GMB-1678-4685-GMB-2018-0014-s005.pdf [file 1415-4757-GMB-1678-4685-GMB-2018-0014-s005.pdf]

**Supplementary Material “*In silico* characterization of microRNAs-like sequences in the genome of *Paracoccidioides brasiliensis*”**

**Table S2 - Oligonucleotide sequences used in the present study**

| <b>Genes</b>                  | <b>Forward sequences</b> | <b>Reverse sequence</b>    |
|-------------------------------|--------------------------|----------------------------|
| <i>dcr 1</i>                  | GGAGATTGAAGCTACTGAGAC    | TCTGGCAGACACTATTTACAAC     |
| <i>dcr 2</i>                  | GAGGGAGGCAACCAACTATC     | TTAGAAACCACCTCGTCCTTG      |
| <i>ago-1</i>                  | CCATGGCTGCAGTGTGAGTA     | AAACACCATCGCGGAAGTAGT      |
| <i>ago-2</i>                  | CGACTATTTTCAGACGCACATAT  | GGGTTAAGCTTAGCATTGCC       |
| <i>Act</i>                    | CGTCCTCGCCATCATGGTAT     | TCTCCATATCATCCCAGTTCG      |
| Super.:2.3:1128222-1128358(-) | GCAGTGTGCATGTGCAT        | GGTCCAGTTTTTTTTTTTTTTTTCAC |
| Super.:2.5:587199-587317(+)   | CGCAGAAATCACCTTCAC       | GGTCCAGTTTTTTTTTTTTTTTGAAG |
| Super.:2.6:955763-955879(+)   | GGCGGACGCGATG            | GTCCAGTTTTTTTTTTTTTTTCCAC  |
| Super.:2.12:21200-21275(-)    | CAGCGCAGTAGGATTAGGAT     | GGTCCAGTTTTTTTTTTTTTTTCT   |
| Super.:2.14:171583-171670(+)  | GGAGAGGGGGCCG            | GGTCCAGTTTTTTTTTTTTTTTCAAC |

(\*) all primers described in Table S2 were constructed for this work, except the actin primer.
