# Supplementary material for: In silico characterization of microRNAs-like sequences in the genome of Paracoccidioides brasiliensis
Source: PubMed Central journal article supplement (PMC6428129; doi:10.1590/1678-4685-gmb-2018-0014), 2019-02-14
Supplement: 1415-4757-GMB-1678-4685-GMB-2018-0014-s006.pdf [file 1415-4757-GMB-1678-4685-GMB-2018-0014-s006.pdf]

**Supplementary Material “*In silico* characterization of microRNAs-like sequences in the genome of  
*Paracoccidioides brasiliensis*”**

**Table S3** - miRNAs-like homologs to other fungi species identified in the genome of *Paracoccidioides brasiliensis* Pb18.

| Query ID <sup>a</sup> | Sequence <sup>b</sup>      | Subject ID <sup>c</sup> | Identity (%) <sup>d</sup> | Alignment length <sup>e</sup> | Mismatches <sup>f</sup> | Gap opens <sup>g</sup> | E-value <sup>h</sup> | Bit score <sup>i</sup> | Organism <sup>j</sup>          | Reference <sup>k</sup>     |
|-----------------------|----------------------------|-------------------------|---------------------------|-------------------------------|-------------------------|------------------------|----------------------|------------------------|--------------------------------|----------------------------|
| Afl-miR-13            | CUUUCUGGUUGAUGGCGUCGGA     | Supercontig_2.7         | 100                       | 16                            | 0                       | 0                      | 0.048                | 32.2                   | <i>A.flavus</i>                | Bai <i>et al.</i> , 2015   |
| Afl-miR-23            | GAGGGGAGAGGGGGCCGUUG       | Supercontig_2.14        | 100                       | 17                            | 0                       | 0                      | 0.009                | 34.2                   | <i>A.flavus</i>                |                            |
| Afl-miR-23            | GAGGGGAGAGGGGGCCGUUG       | Supercontig_2.1         | 95                        | 20                            | 1                       | 0                      | 0.036                | 32.2                   | <i>A.flavus</i>                |                            |
| Afl-miR-33            | GGCGAGAUGGCCGAGCGGUC       | Supercontig_2.3         | 100                       | 16                            | 0                       | 0                      | 0.036                | 32.2                   | <i>A.flavus</i>                |                            |
| Afl-miR-33            | GGCGAGAUGGCCGAGCGGUC       | Supercontig_2.9         | 100                       | 17                            | 0                       | 0                      | 0.009                | 34.2                   | <i>A.flavus</i>                |                            |
| Afl-miR-6             | GAGGGCGAGAGGGGUGGAA        | Supercontig_2.14        | 100                       | 16                            | 0                       | 0                      | 0.036                | 32.2                   | <i>A.flavus</i>                |                            |
| Afl-miR-7             | GUGGGAGGUUGAGUGGGUGGUA     | Supercontig_2.3         | 100                       | 16                            | 0                       | 0                      | 0.048                | 32.2                   | <i>A.flavus</i>                |                            |
| Afl-miR-9             | GGCGAGAUGGCCGAGCGGUCC      | Supercontig_2.3         | 100                       | 17                            | 0                       | 0                      | 0.011                | 34.2                   | <i>A.flavus</i>                |                            |
| Afl-miR-9             | GGCGAGAUGGCCGAGCGGUCC      | Supercontig_2.9         | 100                       | 18                            | 0                       | 0                      | 0.003                | 36.2                   | <i>A.flavus</i>                |                            |
| fox_milRNA_2          | GACAACGUGGCCGAGUGGUUAAGGC  | Supercontig_2.2         | 100                       | 18                            | 0                       | 0                      | 0.004                | 36.2                   | <i>F. oxysporum</i>            | Chen <i>et al.</i> , 2014  |
| fox_milRNA_2          | GACAACGUGGCCGAGUGGUUAAGGC  | Supercontig_2.6         | 100                       | 18                            | 0                       | 0                      | 0.004                | 36.2                   | <i>F. oxysporum</i>            |                            |
| fox_milRNA_4          | UGGAUGAAUCAAGCGUGGUAUGA    | Supercontig_2.9         | 100                       | 16                            | 0                       | 0                      | 0.054                | 32.2                   | <i>F. oxysporum</i>            |                            |
| fox_milRNA_8          | CUUGAGACCCGGGUUCAAUUCCCGGC | Supercontig_2.8         | 95.65                     | 23                            | 1                       | 0                      | 0.001                | 38.2                   | <i>F. oxysporum</i>            |                            |
| man-miR-10            | AGGGAUCUAGAAAAGAAGGCUU     | Supercontig_2.8         | 100                       | 16                            | 0                       | 0                      | 0.048                | 32.2                   | <i>M. anisopliae</i>           | Zhou <i>et al.</i> , 2012  |
| man-miR-14            | UAAAAGAUGUGGAAAAGAAGGC     | Supercontig_2.3         | 100                       | 17                            | 0                       | 0                      | 0.012                | 34.2                   | <i>M. anisopliae</i>           |                            |
| man-miR-5             | UUAACAAGGCGUCGAGGGUAU      | Supercontig_2.1         | 100                       | 16                            | 0                       | 0                      | 0.042                | 32.2                   | <i>M. anisopliae</i>           |                            |
| miR-18                | TTGGCAGGAATGTGGTGGACGAACA  | Supercontig_2.3         | 100                       | 17                            | 0                       | 0                      | 0.017                | 34.2                   | <i>N. crassa</i>               | Yang <i>et al.</i> , 2013  |
| miR-1                 | TAAGCCGCGAGTACGCCTCCGGACT  | Supercontig_2.3         | 100                       | 16                            | 0                       | 0                      | 0.066                | 32.2                   | <i>N. crassa</i>               |                            |
| miR-4                 | TTCCCAAATCACCTTCACCTTCACC  | Supercontig_2.12        | 100                       | 17                            | 0                       | 0                      | 0.017                | 34.2                   | <i>N. crassa</i>               |                            |
| miR-4                 | TTCCCAAATCACCTTCACCTTCACC  | Supercontig_2.5         | 100                       | 18                            | 0                       | 0                      | 0.004                | 36.2                   | <i>N. crassa</i>               |                            |
| miR-6                 | GGCCGATTCCTCGTCAGTCA       | Supercontig_2.1         | 100                       | 16                            | 0                       | 0                      | 0.042                | 32.2                   | <i>N. crassa</i>               |                            |
| PM-miR-MC17           | UGGCGGACGCGAUGGUGGAGG      | Supercontig_2.6         | 100                       | 16                            | 0                       | 0                      | 0.042                | 32.2                   | <i>P. marneffeii</i>           | Lau <i>et al.</i> , 2013   |
| PM-miR-MC7            | UAGGAUUAGGAUUAGGAUUA       | Supercontig_2.1         | 100                       | 16                            | 0                       | 0                      | 0.036                | 32.2                   | <i>P. marneffeii</i>           |                            |
| PM-miR-MC7            | UAGGAUUAGGAUUAGGAUUA       | Supercontig_2.12        | 100                       | 16                            | 0                       | 0                      | 0.036                | 32.2                   | <i>P. marneffeii</i>           |                            |
| PM-miR-MC7            | UAGGAUUAGGAUUAGGAUUA       | Supercontig_2.12        | 100                       | 16                            | 0                       | 0                      | 0.036                | 32.2                   | <i>P. marneffeii</i>           |                            |
| PM-miR-MC7            | UAGGAUUAGGAUUAGGAUUA       | Supercontig_2.12        | 100                       | 17                            | 0                       | 0                      | 0.009                | 34.2                   | <i>P. marneffeii</i>           |                            |
| PM-miR-MC7            | UAGGAUUAGGAUUAGGAUUA       | Supercontig_2.2         | 95                        | 20                            | 1                       | 0                      | 0.036                | 32.2                   | <i>P. marneffeii</i>           |                            |
| PM-miR-MC7            | UAGGAUUAGGAUUAGGAUUA       | Supercontig_2.4         | 100                       | 17                            | 0                       | 0                      | 0.009                | 34.2                   | <i>P. marneffeii</i>           |                            |
| PM-miR-MC7            | UAGGAUUAGGAUUAGGAUUA       | Supercontig_2.5         | 100                       | 16                            | 0                       | 0                      | 0.036                | 32.2                   | <i>P. marneffeii</i>           |                            |
| PM-miR-MC7            | UAGGAUUAGGAUUAGGAUUA       | Supercontig_2.5         | 100                       | 17                            | 0                       | 0                      | 0.009                | 34.2                   | <i>P. marneffeii</i>           |                            |
| PM-miR-MC7            | UAGGAUUAGGAUUAGGAUUA       | Supercontig_2.5         | 95                        | 20                            | 1                       | 0                      | 0.036                | 32.2                   | <i>P. marneffeii</i>           |                            |
| PM-miR-YC1            | UGCCAUGCUAAGUCAAGG         | Supercontig_2.3         | 100                       | 17                            | 0                       | 0                      | 0.008                | 34.2                   | <i>P. marneffeii</i>           |                            |
| Tre-miR-2             | TCTCTGTTGGAGTTGAGGGGG      | Supercontig_2.2         | 100                       | 16                            | 0                       | 0                      | 0.042                | 32.2                   | <i>T. reesei</i>               | Kang <i>et al.</i> , 2013  |
| miR1                  | TCCTGAACTTGATCACCATTGA     | -                       | -                         | -                             | -                       | -                      | -                    | -                      | <i>Cryptococcus neoformans</i> | Jiang <i>et al.</i> , 2012 |
| miR2                  | TCGACACCTTCATCGTAA         | -                       | -                         | -                             | -                       | -                      | -                    | -                      | <i>Cryptococcus neoformans</i> |                            |
| Afl-miR-4             | GUGGAGGAUUGGGACGGGGU       | -                       | -                         | -                             | -                       | -                      | -                    | -                      | <i>A.flavus</i>                |                            |

| Query ID <sup>a</sup> | Sequence <sup>b</sup>         | Subject ID <sup>c</sup> | Identity (%) <sup>d</sup> | Alignment length <sup>e</sup> | Mismatches <sup>f</sup> | Gap opens <sup>g</sup> | E-value <sup>h</sup> | Bit score <sup>i</sup> | Organism <sup>j</sup> | Reference <sup>k</sup> |
|-----------------------|-------------------------------|-------------------------|---------------------------|-------------------------------|-------------------------|------------------------|----------------------|------------------------|-----------------------|------------------------|
| Afl-milR-5            | CUUUGGAGGGAUUGGUGGGA          | -                       | -                         | -                             | -                       | -                      | -                    | -                      | <i>A.flavus</i>       |                        |
| Afl-milR-8            | UUUUGUGGAAUCUGCCUCGCGCU       | -                       | -                         | -                             | -                       | -                      | -                    | -                      | <i>A.flavus</i>       |                        |
| Afl-milR-10           | CUGGAUUCGUCCCGGGAACCC         | -                       | -                         | -                             | -                       | -                      | -                    | -                      | <i>A.flavus</i>       |                        |
| Afl-milR-11           | AGCGGUCUAAGGCGCACGGUUCA       | -                       | -                         | -                             | -                       | -                      | -                    | -                      | <i>A.flavus</i>       |                        |
| Afl-milR-12           | CUUCUAUCUCGUCGGGGUCA          | -                       | -                         | -                             | -                       | -                      | -                    | -                      | <i>A.flavus</i>       |                        |
| Afl-milR-14           | AAAGGGGCAUGGGUAGUAUGA         | -                       | -                         | -                             | -                       | -                      | -                    | -                      | <i>A.flavus</i>       |                        |
| Afl-milR-15           | CUGGUCGGGUUGAUGAUGGA          | -                       | -                         | -                             | -                       | -                      | -                    | -                      | <i>A.flavus</i>       |                        |
| Afl-milR-16           | AUUGCUUGCAUGUUCGUUCUGGA       | -                       | -                         | -                             | -                       | -                      | -                    | -                      | <i>A.flavus</i>       |                        |
| Afl-milR-17           | CUUUCUCAUAUAUACGUCGGAA        | -                       | -                         | -                             | -                       | -                      | -                    | -                      | <i>A.flavus</i>       |                        |
| Afl-milR-18           | CCAUGAUACUUUGUUGGUCGGA        | -                       | -                         | -                             | -                       | -                      | -                    | -                      | <i>A.flavus</i>       |                        |
| Afl-milR-19           | AGCGAGACGACCUGCCUGGCA         | -                       | -                         | -                             | -                       | -                      | -                    | -                      | <i>A.flavus</i>       |                        |
| Afl-milR-20           | CAUCUCUCUUGUCGGUUCGAGA        | -                       | -                         | -                             | -                       | -                      | -                    | -                      | <i>A.flavus</i>       |                        |
| Afl-milR-21           | AUGGGGGUCUGUAUGUGAUGGA        | -                       | -                         | -                             | -                       | -                      | -                    | -                      | <i>A.flavus</i>       |                        |
| Afl-milR-22           | GGAAGUUGAUCUUGAUUGUUGGA       | -                       | -                         | -                             | -                       | -                      | -                    | -                      | <i>A.flavus</i>       |                        |
| Afl-milR-24           | UGGCUAUCGAUCGAUCGUCGGA        | -                       | -                         | -                             | -                       | -                      | -                    | -                      | <i>A.flavus</i>       |                        |
| Afl-milR-25           | GUGUAGGGUGUGGUAGUGCUC         | -                       | -                         | -                             | -                       | -                      | -                    | -                      | <i>A.flavus</i>       |                        |
| Afl-milR-26           | CCUGUCUAUCGAGGAUUGUUGGA       | -                       | -                         | -                             | -                       | -                      | -                    | -                      | <i>A.flavus</i>       |                        |
| Afl-milR-27           | GGAUGAUAGGUCGGGAUGAGA         | -                       | -                         | -                             | -                       | -                      | -                    | -                      | <i>A.flavus</i>       |                        |
| Afl-milR-28           | UAGCUAUCUCGUGACAGACAAU        | -                       | -                         | -                             | -                       | -                      | -                    | -                      | <i>A.flavus</i>       |                        |
| Afl-milR-29           | ACUCCUUGGGCGCAUCGUUGGA        | -                       | -                         | -                             | -                       | -                      | -                    | -                      | <i>A.flavus</i>       |                        |
| Afl-milR-30           | UUACUGUACAUAAGCUAGACA         | -                       | -                         | -                             | -                       | -                      | -                    | -                      | <i>A.flavus</i>       |                        |
| Afl-milR-31           | CAAGGAUUGUGAUUGUUCUGGA        | -                       | -                         | -                             | -                       | -                      | -                    | -                      | <i>A.flavus</i>       |                        |
| Afl-milR-32           | CUUGUUCGUCGGGGGAUGGCA         | -                       | -                         | -                             | -                       | -                      | -                    | -                      | <i>A.flavus</i>       |                        |
| Afl-milR-34           | AAGGCGGACGUUGGCGGCUGAUA       | -                       | -                         | -                             | -                       | -                      | -                    | -                      | <i>A.flavus</i>       |                        |
| Afl-milR-35           | GGCGGACUGCUCAAACGACGGA        | -                       | -                         | -                             | -                       | -                      | -                    | -                      | <i>A.flavus</i>       |                        |
| Afl-milR-36           | ACUUUAGAUGGUCGUGUUGGGGA       | -                       | -                         | -                             | -                       | -                      | -                    | -                      | <i>A.flavus</i>       |                        |
| Afl-milR-37           | CAUUGUUUAAGCGUCGUUGGAA        | -                       | -                         | -                             | -                       | -                      | -                    | -                      | <i>A.flavus</i>       |                        |
| Afl-milR-38           | CCAUGGGAUUCUAAUCGUCGGA        | -                       | -                         | -                             | -                       | -                      | -                    | -                      | <i>A.flavus</i>       |                        |
| Afl-milR-39           | GGUUUUGAUGAUCGUGUCGGA         | -                       | -                         | -                             | -                       | -                      | -                    | -                      | <i>A.flavus</i>       |                        |
| Afl-milR-40           | CCUAUCGGCAUUGUGAGACGGA        | -                       | -                         | -                             | -                       | -                      | -                    | -                      | <i>A.flavus</i>       |                        |
| Afl-milR-41           | GUCGUGGUAAGUGUGGCGUCGGA       | -                       | -                         | -                             | -                       | -                      | -                    | -                      | <i>A.flavus</i>       |                        |
| Afl-milR-42           | GUUCUCAGCACGAUCGGCCGGA        | -                       | -                         | -                             | -                       | -                      | -                    | -                      | <i>A.flavus</i>       |                        |
| Afl-milR-43           | CCUAGGACAAGGGCGCACAGAGU       | -                       | -                         | -                             | -                       | -                      | -                    | -                      | <i>A.flavus</i>       |                        |
| Afl-milR-44           | GUAUCA AUGACAGAU CGUAAGGA     | -                       | -                         | -                             | -                       | -                      | -                    | -                      | <i>A.flavus</i>       |                        |
| Afl-milR-45           | AGGCGACUGGUACAUGUAUGG         | -                       | -                         | -                             | -                       | -                      | -                    | -                      | <i>A.flavus</i>       |                        |
| Afl-milR-46           | AUGGCAUUGAAUCGGUCGGGA         | -                       | -                         | -                             | -                       | -                      | -                    | -                      | <i>A.flavus</i>       |                        |
| Afl-milR-47           | AUGUAGUACUGCAUCGUUCUGGA       | -                       | -                         | -                             | -                       | -                      | -                    | -                      | <i>A.flavus</i>       |                        |
| Afl-milR-48           | UGGGUGGUGGGGUGGCGAUGGCU       | -                       | -                         | -                             | -                       | -                      | -                    | -                      | <i>A.flavus</i>       |                        |
| fox_milRNA_1          | UGCUAGGGUAGAGAAUUUUUGCAGGC    | -                       | -                         | -                             | -                       | -                      | -                    | -                      | <i>F. oxysporum</i>   |                        |
| fox_milRNA_2          | GGCAUUGUGUUCGCACGCGUAGGUUCG   | -                       | -                         | -                             | -                       | -                      | -                    | -                      | <i>F. oxysporum</i>   |                        |
| fox_milRNA_3a         | GGUGUGGUGUAUCGGUUUAUCAUCCGC   | -                       | -                         | -                             | -                       | -                      | -                    | -                      | <i>F. oxysporum</i>   |                        |
| fox_milRNA_3b         | CCGUGUGGUGUAUCGGUUAUCAUCCGC   | -                       | -                         | -                             | -                       | -                      | -                    | -                      | <i>F. oxysporum</i>   |                        |
| fox_milRNA_5          | UCCGGUAUGGUGUAGUGGC           | -                       | -                         | -                             | -                       | -                      | -                    | -                      | <i>F. oxysporum</i>   |                        |
| fox_milRNA_6          | GUUCCGUGGUCUAGUUGGUUAUGGCAUCU | -                       | -                         | -                             | -                       | -                      | -                    | -                      | <i>F. oxysporum</i>   |                        |
| fox_milRNA_7          | CUUCCGUAGUAUAGUGGUCAGUAUGCA   | -                       | -                         | -                             | -                       | -                      | -                    | -                      | <i>F. oxysporum</i>   |                        |
| man-milR-1            | UAUCUUGUGGACUAAUAGGUA         | -                       | -                         | -                             | -                       | -                      | -                    | -                      | <i>M. anisopliae</i>  |                        |

| Query ID <sup>a</sup> | Sequence <sup>b</sup>     | Subject ID <sup>c</sup> | Identity (%) <sup>d</sup> | Alignment length <sup>e</sup> | Mismatches <sup>f</sup> | Gap opens <sup>g</sup> | E-value <sup>h</sup> | Bit score <sup>i</sup> | Organism <sup>j</sup> | Reference <sup>k</sup> |
|-----------------------|---------------------------|-------------------------|---------------------------|-------------------------------|-------------------------|------------------------|----------------------|------------------------|-----------------------|------------------------|
| man-miR-2             | UACAAGGGCACGAGCAAGGU      | -                       | -                         | -                             | -                       | -                      | -                    | -                      | <i>M. anisopliae</i>  |                        |
| man-miR-3             | UUGUCGAGGCAUACCACUAUU     | -                       | -                         | -                             | -                       | -                      | -                    | -                      | <i>M. anisopliae</i>  |                        |
| man-miR-4             | UCGAGGAGCAGAAGCUGAUCUU    | -                       | -                         | -                             | -                       | -                      | -                    | -                      | <i>M. anisopliae</i>  |                        |
| man-miR-6             | UUUGGAGAGGCUGCUGUGUUU     | -                       | -                         | -                             | -                       | -                      | -                    | -                      | <i>M. anisopliae</i>  |                        |
| man-miR-7             | GCGGGUGCUGAGAAAGCGUUUA    | -                       | -                         | -                             | -                       | -                      | -                    | -                      | <i>M. anisopliae</i>  |                        |
| man-miR-8             | UUGCAUGAUGAGACUUAUUU      | -                       | -                         | -                             | -                       | -                      | -                    | -                      | <i>M. anisopliae</i>  |                        |
| man-miR-9             | UGCCUAGGCAGGGUAGAUCAG     | -                       | -                         | -                             | -                       | -                      | -                    | -                      | <i>M. anisopliae</i>  |                        |
| man-miR-11            | UGCAGGGGAGCAUCGUCGUUG     | -                       | -                         | -                             | -                       | -                      | -                    | -                      | <i>M. anisopliae</i>  |                        |
| man-miR-12            | AGACCUCGUUGAUGCUGGCAUU    | -                       | -                         | -                             | -                       | -                      | -                    | -                      | <i>M. anisopliae</i>  |                        |
| man-miR-13            | CGACGACUCUGGCGAGGACAA     | -                       | -                         | -                             | -                       | -                      | -                    | -                      | <i>M. anisopliae</i>  |                        |
| man-miR-15            | GAUGUCGAAUCGUGCCGGGGCUC   | -                       | -                         | -                             | -                       | -                      | -                    | -                      | <i>M. anisopliae</i>  |                        |
| miR-2                 | TGTCCTGGTACTTTCATCCGGCTGT | -                       | -                         | -                             | -                       | -                      | -                    | -                      | <i>N. crassa</i>      |                        |
| miR-3                 | TGAACGAGCGGTTGTTGT        | -                       | -                         | -                             | -                       | -                      | -                    | -                      | <i>N. crassa</i>      |                        |
| miR-5                 | AAGCAAGATCCGGACATTC       | -                       | -                         | -                             | -                       | -                      | -                    | -                      | <i>N. crassa</i>      |                        |
| miR-7                 | TGCGGTGCTTTCCTTGCCCT      | -                       | -                         | -                             | -                       | -                      | -                    | -                      | <i>N. crassa</i>      |                        |
| miR-8                 | AAACGCTCTACCGGTTGCTGTTAGA | -                       | -                         | -                             | -                       | -                      | -                    | -                      | <i>N. crassa</i>      |                        |
| miR-9                 | GAGCTTGTCGCCTTCAA         | -                       | -                         | -                             | -                       | -                      | -                    | -                      | <i>N. crassa</i>      |                        |
| miR-10                | CACTCGTGTGCTGTAGCGGGACTA  | -                       | -                         | -                             | -                       | -                      | -                    | -                      | <i>N. crassa</i>      |                        |
| miR-11                | TGACCGGGCGGTTGTTGTT       | -                       | -                         | -                             | -                       | -                      | -                    | -                      | <i>N. crassa</i>      |                        |
| miR-12                | TCATCCGATCATGTCACATTGTC   | -                       | -                         | -                             | -                       | -                      | -                    | -                      | <i>N. crassa</i>      |                        |
| miR-13                | TGGGAATGTGAGGCGTTTG       | -                       | -                         | -                             | -                       | -                      | -                    | -                      | <i>N. crassa</i>      |                        |
| miR-14                | TGCCGTGTCGTAGCATCGAAGTCAA | -                       | -                         | -                             | -                       | -                      | -                    | -                      | <i>N. crassa</i>      |                        |
| miR-15                | TTATTTGCCAAATCAACTCGG     | -                       | -                         | -                             | -                       | -                      | -                    | -                      | <i>N. crassa</i>      |                        |
| miR-16                | TACTTGATTCACAGCGTCTATAC   | -                       | -                         | -                             | -                       | -                      | -                    | -                      | <i>N. crassa</i>      |                        |
| miR-17                | CGGCATCAGCGTGTTC          | -                       | -                         | -                             | -                       | -                      | -                    | -                      | <i>N. crassa</i>      |                        |
| miR-19                | GATACACGCTAGATGTCCCT      | -                       | -                         | -                             | -                       | -                      | -                    | -                      | <i>N. crassa</i>      |                        |
| miR-20                | TACTCTGTGTGCTCGGTGTGGTT   | -                       | -                         | -                             | -                       | -                      | -                    | -                      | <i>N. crassa</i>      |                        |
| miR--21               | ATCCTGGCTTCCTTTGCCTG      | -                       | -                         | -                             | -                       | -                      | -                    | -                      | <i>N. crassa</i>      |                        |
| miR-22                | TGGAGGGTGATATATGGTTTGCCAG | -                       | -                         | -                             | -                       | -                      | -                    | -                      | <i>N. crassa</i>      |                        |
| miR-23                | TGCAATCTAGTCGCGTTCCCTCTT  | -                       | -                         | -                             | -                       | -                      | -                    | -                      | <i>N. crassa</i>      |                        |
| miR-24                | TGCGGGGCATTGAGTGGTTCGACG  | -                       | -                         | -                             | -                       | -                      | -                    | -                      | <i>N. crassa</i>      |                        |
| miR-25                | CGACGCGGAGAAGAAGGGGATTG   | -                       | -                         | -                             | -                       | -                      | -                    | -                      | <i>N. crassa</i>      |                        |
| PM-miR-M1             | GAGAAACGCCUUAUGAUCGAC     | -                       | -                         | -                             | -                       | -                      | -                    | -                      | <i>P. marneffeii</i>  |                        |
| PM-miR-M1*            | UGACUCGAAGAGCCUCUA        | -                       | -                         | -                             | -                       | -                      | -                    | -                      | <i>P. marneffeii</i>  |                        |
| PM-miR-M2             | GUCCUAUAGUAAAGCCAGUC      | -                       | -                         | -                             | -                       | -                      | -                    | -                      | <i>P. marneffeii</i>  |                        |
| PM-miR-M2*            | AUUUCUAGGCUAUAAGCUU       | -                       | -                         | -                             | -                       | -                      | -                    | -                      | <i>P. marneffeii</i>  |                        |
| PM-miR-MC3            | UGAUAUCAAAGUGGGCUAUC      | -                       | -                         | -                             | -                       | -                      | -                    | -                      | <i>P. marneffeii</i>  |                        |
| PM-miR-MC4            | UCAAGUCAACCCUACUC         | -                       | -                         | -                             | -                       | -                      | -                    | -                      | <i>P. marneffeii</i>  |                        |
| PM-miR-MC5            | UUGCUAUGAUGAAAGCUGAGCA    | -                       | -                         | -                             | -                       | -                      | -                    | -                      | <i>P. marneffeii</i>  |                        |
| PM-miR-MC6            | AACGUUUAAAUUCCGAUACAAUU   | -                       | -                         | -                             | -                       | -                      | -                    | -                      | <i>P. marneffeii</i>  |                        |
| PM-miR-MC8            | UUUCUACAGCUGCUGAACGUC     | -                       | -                         | -                             | -                       | -                      | -                    | -                      | <i>P. marneffeii</i>  |                        |
| PM-miR-MC9            | UUGGCGUUGGGUGUAAUUG       | -                       | -                         | -                             | -                       | -                      | -                    | -                      | <i>P. marneffeii</i>  |                        |
| PM-miR-MC10           | UCGACUGGUCACCUGAUGCC      | -                       | -                         | -                             | -                       | -                      | -                    | -                      | <i>P. marneffeii</i>  |                        |
| PM-miR-MC11           | UCGAUGUACUCCUUGUGGA       | -                       | -                         | -                             | -                       | -                      | -                    | -                      | <i>P. marneffeii</i>  |                        |
| PM-miR-MC12           | UGUUAUCGAUCUGCUGUAGA      | -                       | -                         | -                             | -                       | -                      | -                    | -                      | <i>P. marneffeii</i>  |                        |
| PM-miR-MC13           | UGCCACUCGAUCAUCUUGGG      | -                       | -                         | -                             | -                       | -                      | -                    | -                      | <i>P. marneffeii</i>  |                        |

| Query ID <sup>a</sup> | Sequence <sup>b</sup>   | Subject ID <sup>c</sup> | Identity (%) <sup>d</sup> | Alignment length <sup>e</sup> | Mismatches <sup>f</sup> | Gap opens <sup>g</sup> | E-value <sup>h</sup> | Bit score <sup>i</sup> | Organism <sup>j</sup> | Reference <sup>k</sup> |
|-----------------------|-------------------------|-------------------------|---------------------------|-------------------------------|-------------------------|------------------------|----------------------|------------------------|-----------------------|------------------------|
| PM-milR-MC14          | UAAGAGCUGUACAUUAUGUAAG  | -                       | -                         | -                             | -                       | -                      | -                    | -                      | <i>P. marneffeii</i>  |                        |
| PM-milR-MC15          | AUCCGGAUCGAGUUAUUCAC    | -                       | -                         | -                             | -                       | -                      | -                    | -                      | <i>P. marneffeii</i>  |                        |
| PM-milR-MC16          | CAUAAGGUCGAGAGUCUCGCA   | -                       | -                         | -                             | -                       | -                      | -                    | -                      | <i>P. marneffeii</i>  |                        |
| PM-milR-YC2           | CAGCGGUGAUGACAACC       | -                       | -                         | -                             | -                       | -                      | -                    | -                      | <i>P. marneffeii</i>  |                        |
| PM-milR-YC3           | CCGCUUCUAAAAUUGCUAGAGC  | -                       | -                         | -                             | -                       | -                      | -                    | -                      | <i>P. marneffeii</i>  |                        |
| PM-milR-YC4           | UUGCUAUGAUGAAAGCUGAGCA  | -                       | -                         | -                             | -                       | -                      | -                    | -                      | <i>P. marneffeii</i>  |                        |
| PM-milR-YC5           | UUUCUUGUCUACCUUUCGAGU   | -                       | -                         | -                             | -                       | -                      | -                    | -                      | <i>P. marneffeii</i>  |                        |
| PM-milR-YC6           | UUCUCGGUGGCGAUGUCCAUI   | -                       | -                         | -                             | -                       | -                      | -                    | -                      | <i>P. marneffeii</i>  |                        |
| PM-milR-YC7           | CCUUCAGAUUCUGGGCUAUGCCC | -                       | -                         | -                             | -                       | -                      | -                    | -                      | <i>P. marneffeii</i>  |                        |
| Tre-milR-1            | AGCCGGCTGTTGACGTAGGTGA  | -                       | -                         | -                             | -                       | -                      | -                    | -                      | <i>T. reesei</i>      |                        |
| Tre-milR-3            | GGGAGAATGCGCCGTGATTGT   | -                       | -                         | -                             | -                       | -                      | -                    | -                      | <i>T. reesei</i>      |                        |
| Tre-milR-4            | AGCAGCGACGGCGAACTCTGC   | -                       | -                         | -                             | -                       | -                      | -                    | -                      | <i>T. reesei</i>      |                        |
| Tre-milR-5            | CCCGTTTATCTGATCAACGCCG  | -                       | -                         | -                             | -                       | -                      | -                    | -                      | <i>T. reesei</i>      |                        |
| Tre-milR-6            | CGGAGCTGGAGGAGGACTGCGA  | -                       | -                         | -                             | -                       | -                      | -                    | -                      | <i>T. reesei</i>      |                        |
| Tre-milR-7            | TCAAGGGGAATCTGAGGCAG    | -                       | -                         | -                             | -                       | -                      | -                    | -                      | <i>T. reesei</i>      |                        |
| Tre-milR-8            | CTCGAGGGAAGTGGAGATGGA   | -                       | -                         | -                             | -                       | -                      | -                    | -                      | <i>T. reesei</i>      |                        |
| Tre-milR-9            | TGGCATGTTAGACAAGTTGCG   | -                       | -                         | -                             | -                       | -                      | -                    | -                      | <i>T. reesei</i>      |                        |
| Tre-milR-10           | AGGCTGTACTGTAGGGCAG     | -                       | -                         | -                             | -                       | -                      | -                    | -                      | <i>T. reesei</i>      |                        |
| Tre-milR-11           | TGGAGACGTGGAGCCGGA      | -                       | -                         | -                             | -                       | -                      | -                    | -                      | <i>T. reesei</i>      |                        |
| Tre-milR-12           | GGTGCGGGCTGGCGGCGG      | -                       | -                         | -                             | -                       | -                      | -                    | -                      | <i>T. reesei</i>      |                        |
| Tre-milR-13           | CCAGCAGGACTATGACGACG    | -                       | -                         | -                             | -                       | -                      | -                    | -                      | <i>T. reesei</i>      |                        |

- a) Identifier of the miRNAs-like;  
b) Sequence;  
c) Alignment region;  
d) Percent of the identity between the sequences;  
e) Size of alignment between the sequences of miRNAs-like and the genome region of *P. brasiliensis* (Pb18);  
f) Number of different bases between the aligned sequences;  
g) Absence of complementary bases between the sequences;  
h) Likelihood sequence analyzed to align randomly to other sequences in the database. false positive rate;  
i) Normalized score obtained using the following formula:  $S' = (I S - \ln K) / \ln 2$ ;  
j) Microorganism which miRNA-like have been described;  
k) Articles describing miRNAs-like in fungus;  
l) (-) Absence of alignment in genome of *P. brasiliensis* (Pb18);  
m) (\*) microRNA star.
