# Supplementary material for: In silico characterization of microRNAs-like sequences in the genome of Paracoccidioides brasiliensis
Source: PubMed Central journal article supplement (PMC6428129; doi:10.1590/1678-4685-gmb-2018-0014), 2019-02-14
Supplement: 1415-4757-GMB-1678-4685-GMB-2018-0014-s007.pdf [file 1415-4757-GMB-1678-4685-GMB-2018-0014-s007.pdf]

| Query id <sup>a</sup> | Subject id <sup>b</sup> | % Identity <sup>c</sup> | Alignment length <sup>d</sup> | Mismatches <sup>e</sup> | Gap opens <sup>f</sup> | Evalue <sup>g</sup> | Bit score <sup>h</sup> | Fungi vesicle <sup>i</sup> | Reference <sup>j</sup> |
|-----------------------|-------------------------|-------------------------|-------------------------------|-------------------------|------------------------|---------------------|------------------------|----------------------------|------------------------|
| ath-miR5021           | Supercontig_2.2         | 100                     | 16                            | 0                       | 0                      | 0.036               | 32.2                   | <i>S. cerevisiae</i>       |                        |
| ath-miR5021           | Supercontig_2.2         | 100                     | 16                            | 0                       | 0                      | 0.036               | 32.2                   | <i>S. cerevisiae</i>       |                        |
| ath-miR5021           | Supercontig_2.2         | 100                     | 16                            | 0                       | 0                      | 0.036               | 32.2                   | <i>S. cerevisiae</i>       |                        |
| ath-miR5021           | Supercontig_2.2         | 100                     | 16                            | 0                       | 0                      | 0.036               | 32.2                   | <i>S. cerevisiae</i>       |                        |
| ath-miR5021           | Supercontig_2.2         | 100                     | 16                            | 0                       | 0                      | 0.036               | 32.2                   | <i>S. cerevisiae</i>       |                        |
| ath-miR5021           | Supercontig_2.2         | 100                     | 17                            | 0                       | 0                      | 0.009               | 34.2                   | <i>S. cerevisiae</i>       |                        |
| ath-miR5021           | Supercontig_2.2         | 100                     | 17                            | 0                       | 0                      | 0.009               | 34.2                   | <i>S. cerevisiae</i>       |                        |
| ath-miR5021           | Supercontig_2.2         | 100                     | 17                            | 0                       | 0                      | 0.009               | 34.2                   | <i>S. cerevisiae</i>       |                        |
| ath-miR5021           | Supercontig_2.2         | 100                     | 17                            | 0                       | 0                      | 0.009               | 34.2                   | <i>S. cerevisiae</i>       |                        |
| ath-miR5021           | Supercontig_2.2         | 100                     | 17                            | 0                       | 0                      | 0.009               | 34.2                   | <i>S. cerevisiae</i>       |                        |
| ath-miR5021           | Supercontig_2.2         | 100                     | 17                            | 0                       | 0                      | 0.009               | 34.2                   | <i>S. cerevisiae</i>       |                        |
| ath-miR5021           | Supercontig_2.2         | 100                     | 17                            | 0                       | 0                      | 0.009               | 34.2                   | <i>S. cerevisiae</i>       |                        |
| ath-miR5021           | Supercontig_2.2         | 100                     | 17                            | 0                       | 0                      | 0.009               | 34.2                   | <i>S. cerevisiae</i>       |                        |
| ath-miR5021           | Supercontig_2.2         | 100                     | 18                            | 0                       | 0                      | 0.002               | 36.2                   | <i>S. cerevisiae</i>       |                        |
| ath-miR5021           | Supercontig_2.2         | 100                     | 18                            | 0                       | 0                      | 0.002               | 36.2                   | <i>S. cerevisiae</i>       |                        |
| ath-miR5021           | Supercontig_2.2         | 100                     | 18                            | 0                       | 0                      | 0.002               | 36.2                   | <i>S. cerevisiae</i>       |                        |
| ath-miR5021           | Supercontig_2.2         | 100                     | 18                            | 0                       | 0                      | 0.002               | 36.2                   | <i>S. cerevisiae</i>       |                        |
| ath-miR5021           | Supercontig_2.2         | 100                     | 18                            | 0                       | 0                      | 0.002               | 36.2                   | <i>S. cerevisiae</i>       |                        |
| ath-miR5021           | Supercontig_2.2         | 100                     | 18                            | 0                       | 0                      | 0.002               | 36.2                   | <i>S. cerevisiae</i>       |                        |
| ath-miR5021           | Supercontig_2.2         | 100                     | 18                            | 0                       | 0                      | 0.002               | 36.2                   | <i>S. cerevisiae</i>       |                        |
| ath-miR5021           | Supercontig_2.2         | 100                     | 18                            | 0                       | 0                      | 0.002               | 36.2                   | <i>S. cerevisiae</i>       |                        |
| ath-miR5021           | Supercontig_2.2         | 100                     | 18                            | 0                       | 0                      | 0.002               | 36.2                   | <i>S. cerevisiae</i>       |                        |
| ath-miR5021           | Supercontig_2.2         | 100                     | 19                            | 0                       | 0                      | 6.00E-04            | 38.2                   | <i>S. cerevisiae</i>       |                        |
| ath-miR5021           | Supercontig_2.21        | 100                     | 16                            | 0                       | 0                      | 0.036               | 32.2                   | <i>S. cerevisiae</i>       |                        |
| ath-miR5021           | Supercontig_2.21        | 100                     | 16                            | 0                       | 0                      | 0.036               | 32.2                   | <i>S. cerevisiae</i>       |                        |
| ath-miR5021           | Supercontig_2.21        | 100                     | 16                            | 0                       | 0                      | 0.036               | 32.2                   | <i>S. cerevisiae</i>       |                        |
| ath-miR5021           | Supercontig_2.23        | 100                     | 16                            | 0                       | 0                      | 0.036               | 32.2                   | <i>S. cerevisiae</i>       |                        |
| ath-miR5021           | Supercontig_2.23        | 100                     | 16                            | 0                       | 0                      | 0.036               | 32.2                   | <i>S. cerevisiae</i>       |                        |
| ath-miR5021           | Supercontig_2.23        | 100                     | 16                            | 0                       | 0                      | 0.036               | 32.2                   | <i>S. cerevisiae</i>       |                        |
| ath-miR5021           | Supercontig_2.23        | 100                     | 16                            | 0                       | 0                      | 0.036               | 32.2                   | <i>S. cerevisiae</i>       |                        |
| ath-miR5021           | Supercontig_2.23        | 100                     | 16                            | 0                       | 0                      | 0.036               | 32.2                   | <i>S. cerevisiae</i>       |                        |
| ath-miR5021           | Supercontig_2.23        | 100                     | 16                            | 0                       | 0                      | 0.036               | 32.2                   | <i>S. cerevisiae</i>       |                        |
| ath-miR5021           | Supercontig_2.23        | 100                     | 18                            | 0                       | 0                      | 0.002               | 36.2                   | <i>S. cerevisiae</i>       |                        |
| ath-miR5021           | Supercontig_2.24        | 100                     | 16                            | 0                       | 0                      | 0.036               | 32.2                   | <i>S. cerevisiae</i>       |                        |
| ath-miR5021           | Supercontig_2.24        | 100                     | 16                            | 0                       | 0                      | 0.036               | 32.2                   | <i>S. cerevisiae</i>       |                        |
| ath-miR5021           | Supercontig_2.24        | 100                     | 16                            | 0                       | 0                      | 0.036               | 32.2                   | <i>S. cerevisiae</i>       |                        |
| ath-miR5021           | Supercontig_2.25        | 100                     | 16                            | 0                       | 0                      | 0.036               | 32.2                   | <i>S. cerevisiae</i>       |                        |
| ath-miR5021           | Supercontig_2.25        | 100                     | 16                            | 0                       | 0                      | 0.036               | 32.2                   | <i>S. cerevisiae</i>       |                        |
| ath-miR5021           | Supercontig_2.25        | 100                     | 16                            | 0                       | 0                      | 0.036               | 32.2                   | <i>S. cerevisiae</i>       |                        |
| ath-miR5021           | Supercontig_2.25        | 100                     | 16                            | 0                       | 0                      | 0.036               | 32.2                   | <i>S. cerevisiae</i>       |                        |
| ath-miR5021           | Supercontig_2.25        | 100                     | 17                            | 0                       | 0                      | 0.009               | 34.2                   | <i>S. cerevisiae</i>       |                        |
| ath-miR5021           | Supercontig_2.3         | 100                     | 16                            | 0                       | 0                      | 0.036               | 32.2                   | <i>S. cerevisiae</i>       |                        |
| ath-miR5021           | Supercontig_2.3         | 100                     | 16                            | 0                       | 0                      | 0.036               | 32.2                   | <i>S. cerevisiae</i>       |                        |
| ath-miR5021           | Supercontig_2.3         | 100                     | 16                            | 0                       | 0                      | 0.036               | 32.2                   | <i>S. cerevisiae</i>       |                        |
| ath-miR5021           | Supercontig_2.3         | 100                     | 16                            | 0                       | 0                      | 0.036               | 32.2                   | <i>S. cerevisiae</i>       |                        |
| ath-miR5021           | Supercontig_2.3         | 100                     | 16                            | 0                       | 0                      | 0.036               | 32.2                   | <i>S. cerevisiae</i>       |                        |





































| Query id <sup>a</sup> | Subject id <sup>b</sup> | % Identity <sup>c</sup> | Alignment length <sup>d</sup> | Mismatches <sup>e</sup> | Gap opens <sup>f</sup> | Evalue <sup>g</sup> | Bit score <sup>h</sup> | Fungi vesicle <sup>i</sup>                       | Reference <sup>j</sup> |
|-----------------------|-------------------------|-------------------------|-------------------------------|-------------------------|------------------------|---------------------|------------------------|--------------------------------------------------|------------------------|
| bta-miR-2304          | Supercontig_2.10        | 100                     | 16                            | 0                       | 0                      | 0.036               | 32.2                   | <i>C.neoformans</i>                              |                        |
| bta-miR-2304          | Supercontig_2.4         | 100                     | 16                            | 0                       | 0                      | 0.036               | 32.2                   | <i>C.neoformans</i>                              |                        |
| bta-miR-2437          | Supercontig_2.8         | 100                     | 16                            | 0                       | 0                      | 0.042               | 32.2                   | <i>C. albicans</i>                               |                        |
| cfa-miR-214           | Supercontig_2.6         | 100                     | 17                            | 0                       | 0                      | 0.012               | 34.2                   | <i>C.neoformans</i>                              |                        |
| cin-miR-367-5p        | Supercontig_2.2         | 100                     | 17                            | 0                       | 0                      | 0.009               | 34.2                   | <i>C.neoformans/C. albicans</i>                  |                        |
| cin-miR-4171-5p       | Supercontig_2.11        | 100                     | 16                            | 0                       | 0                      | 0.036               | 32.2                   | <i>C.neoformans/C. albicans/S. cerevisiae</i>    |                        |
| cin-miR-4171-5p       | Supercontig_2.32        | 95                      | 20                            | 1                       | 0                      | 0.036               | 32.2                   | <i>C.neoformans/C. albicans/S. cerevisiae</i>    |                        |
| cin-miR-4171-5p       | Supercontig_2.32        | 95                      | 20                            | 1                       | 0                      | 0.036               | 32.2                   | <i>C.neoformans/C. albicans/S. cerevisiae</i>    |                        |
| cin-miR-4171-5p       | Supercontig_2.32        | 95                      | 20                            | 1                       | 0                      | 0.036               | 32.2                   | <i>C.neoformans/C. albicans/S. cerevisiae</i>    |                        |
| cin-miR-4171-5p       | Supercontig_2.32        | 95                      | 20                            | 1                       | 0                      | 0.036               | 32.2                   | <i>C.neoformans/C. albicans/S. cerevisiae</i>    |                        |
| cin-miR-4171-5p       | Supercontig_2.32        | 95                      | 20                            | 1                       | 0                      | 0.036               | 32.2                   | <i>C.neoformans/C. albicans/S. cerevisiae</i>    |                        |
| cin-miR-4171-5p       | Supercontig_2.32        | 95                      | 20                            | 1                       | 0                      | 0.036               | 32.2                   | <i>C.neoformans/C. albicans/S. cerevisiae</i>    |                        |
| cin-miR-4171-5p       | Supercontig_2.32        | 95                      | 20                            | 1                       | 0                      | 0.036               | 32.2                   | <i>C.neoformans/C. albicans/S. cerevisiae</i>    |                        |
| cin-miR-4171-5p       | Supercontig_2.8         | 95                      | 20                            | 1                       | 0                      | 0.036               | 32.2                   | <i>C.neoformans/C. albicans/S. cerevisiae</i>    |                        |
| cin-miR-4171-5p       | Supercontig_2.8         | 95                      | 20                            | 1                       | 0                      | 0.036               | 32.2                   | <i>C.neoformans/C. albicans/S. cerevisiae</i>    |                        |
| cin-miR-4171-5p       | Supercontig_2.8         | 95                      | 20                            | 1                       | 0                      | 0.036               | 32.2                   | <i>C.neoformans/C. albicans/S. cerevisiae</i>    |                        |
| csi-miR3946           | Supercontig_2.13        | 100                     | 16                            | 0                       | 0                      | 0.06                | 32.2                   | <i>C.neoformans/S. cerevisiae</i>                |                        |
| csi-miR3946           | Supercontig_2.2         | 100                     | 16                            | 0                       | 0                      | 0.06                | 32.2                   | <i>C.neoformans/S. cerevisiae</i>                |                        |
| csi-miR3946           | Supercontig_2.3         | 100                     | 16                            | 0                       | 0                      | 0.06                | 32.2                   | <i>C.neoformans/S. cerevisiae</i>                |                        |
| csi-miR3946           | Supercontig_2.6         | 100                     | 16                            | 0                       | 0                      | 0.06                | 32.2                   | <i>C.neoformans/S. cerevisiae</i>                |                        |
| csi-miR3946           | Supercontig_2.6         | 100                     | 16                            | 0                       | 0                      | 0.06                | 32.2                   | <i>C.neoformans/S. cerevisiae</i>                |                        |
| csi-miR3946           | Supercontig_2.8         | 100                     | 16                            | 0                       | 0                      | 0.06                | 32.2                   | <i>C.neoformans/S. cerevisiae</i>                |                        |
| csi-miR3946           | Supercontig_2.8         | 100                     | 17                            | 0                       | 0                      | 0.015               | 34.2                   | <i>C.neoformans/S. cerevisiae</i>                |                        |
| der-miR-13b           | Supercontig_2.11        | 100                     | 16                            | 0                       | 0                      | 0.048               | 32.2                   | <i>P.brasiliensis/C.neoformans/S. cerevisiae</i> |                        |
| dme-miR-2491-3p*      | Supercontig_2.10        | 100                     | 17                            | 0                       | 0                      | 0.008               | 34.2                   | <i>S. cerevisiae</i>                             |                        |
| dme-miR-2491-3p*      | Supercontig_2.10        | 100                     | 17                            | 0                       | 0                      | 0.008               | 34.2                   | <i>S. cerevisiae</i>                             |                        |
| dme-miR-2491-3p*      | Supercontig_2.10        | 100                     | 18                            | 0                       | 0                      | 0.002               | 36.2                   | <i>S. cerevisiae</i>                             |                        |
| dme-miR-2491-3p*      | Supercontig_2.1         | 100                     | 16                            | 0                       | 0                      | 0.03                | 32.2                   | <i>S. cerevisiae</i>                             |                        |
| dme-miR-2491-3p*      | Supercontig_2.1         | 100                     | 17                            | 0                       | 0                      | 0.008               | 34.2                   | <i>S. cerevisiae</i>                             |                        |
| dme-miR-2491-3p*      | Supercontig_2.1         | 100                     | 17                            | 0                       | 0                      | 0.008               | 34.2                   | <i>S. cerevisiae</i>                             |                        |
| dme-miR-2491-3p*      | Supercontig_2.1         | 100                     | 18                            | 0                       | 0                      | 0.002               | 36.2                   | <i>S. cerevisiae</i>                             |                        |
| dme-miR-2491-3p*      | Supercontig_2.1         | 100                     | 18                            | 0                       | 0                      | 0.002               | 36.2                   | <i>S. cerevisiae</i>                             |                        |
| dme-miR-2491-3p*      | Supercontig_2.11        | 100                     | 17                            | 0                       | 0                      | 0.008               | 34.2                   | <i>S. cerevisiae</i>                             |                        |
| dme-miR-2491-3p*      | Supercontig_2.12        | 100                     | 17                            | 0                       | 0                      | 0.008               | 34.2                   | <i>S. cerevisiae</i>                             |                        |
| dme-miR-4968-3p*      | Supercontig_2.10        | 100                     | 16                            | 0                       | 0                      | 0.048               | 32.2                   | <i>C.neoformans/S. cerevisiae</i>                |                        |
| dme-miR-4968-3p*      | Supercontig_2.10        | 100                     | 16                            | 0                       | 0                      | 0.048               | 32.2                   | <i>C.neoformans/S. cerevisiae</i>                |                        |
| dme-miR-4968-3p*      | Supercontig_2.10        | 100                     | 17                            | 0                       | 0                      | 0.012               | 34.2                   | <i>C.neoformans/S. cerevisiae</i>                |                        |
| dme-miR-4968-3p*      | Supercontig_2.10        | 100                     | 17                            | 0                       | 0                      | 0.012               | 34.2                   | <i>C.neoformans/S. cerevisiae</i>                |                        |
| dme-miR-4968-3p*      | Supercontig_2.10        | 100                     | 17                            | 0                       | 0                      | 0.012               | 34.2                   | <i>C.neoformans/S. cerevisiae</i>                |                        |
| dme-miR-4968-3p*      | Supercontig_2.10        | 100                     | 18                            | 0                       | 0                      | 0.003               | 36.2                   | <i>C.neoformans/S. cerevisiae</i>                |                        |
| dme-miR-4968-3p*      | Supercontig_2.10        | 100                     | 21                            | 0                       | 0                      | 5.00E-05            | 42.1                   | <i>C.neoformans/S. cerevisiae</i>                |                        |
| dme-miR-4968-3p*      | Supercontig_2.10        | 100                     | 21                            | 0                       | 0                      | 5.00E-05            | 42.1                   | <i>C.neoformans/S. cerevisiae</i>                |                        |
| dme-miR-4968-3p*      | Supercontig_2.10        | 95                      | 20                            | 1                       | 0                      | 0.048               | 32.2                   | <i>C.neoformans/S. cerevisiae</i>                |                        |
| dme-miR-4968-3p*      | Supercontig_2.10        | 95                      | 20                            | 1                       | 0                      | 0.048               | 32.2                   | <i>C.neoformans/S. cerevisiae</i>                |                        |
| dme-miR-4968-3p*      | Supercontig_2.10        | 95                      | 20                            | 1                       | 0                      | 0.048               | 32.2                   | <i>C.neoformans/S. cerevisiae</i>                |                        |
| dme-miR-4968-3p*      | Supercontig_2.10        | 95                      | 20                            | 1                       | 0                      | 0.048               | 32.2                   | <i>C.neoformans/S. cerevisiae</i>                |                        |







| Query id <sup>a</sup> | Subject id <sup>b</sup> | % Identity <sup>c</sup> | Alignment length <sup>d</sup> | Mismatches <sup>e</sup> | Gap opens <sup>f</sup> | Evalue <sup>g</sup> | Bit score <sup>h</sup> | Fungi vesicle <sup>i</sup>                    | Reference <sup>j</sup> |
|-----------------------|-------------------------|-------------------------|-------------------------------|-------------------------|------------------------|---------------------|------------------------|-----------------------------------------------|------------------------|
| dme-miR-4968-3p*      | Supercontig_2.2         | 100                     | 16                            | 0                       | 0                      | 4.80E-02            | 32.2                   | <i>C.neoformans/S. cerevisiae</i>             |                        |
| dme-miR-4968-3p*      | Supercontig_2.2         | 100                     | 16                            | 0                       | 0                      | 4.80E-02            | 32.2                   | <i>C.neoformans/S. cerevisiae</i>             |                        |
| dme-miR-4968-3p*      | Supercontig_2.2         | 100                     | 16                            | 0                       | 0                      | 0.048               | 32.2                   | <i>C.neoformans/S. cerevisiae</i>             |                        |
| dme-miR-4968-3p*      | Supercontig_2.2         | 100                     | 16                            | 0                       | 0                      | 0.048               | 32.2                   | <i>C.neoformans/S. cerevisiae</i>             |                        |
| dme-miR-4968-3p*      | Supercontig_2.2         | 100                     | 16                            | 0                       | 0                      | 0.048               | 32.2                   | <i>C.neoformans/S. cerevisiae</i>             |                        |
| dme-miR-4968-3p*      | Supercontig_2.2         | 100                     | 16                            | 0                       | 0                      | 0.048               | 32.2                   | <i>C.neoformans/S. cerevisiae</i>             |                        |
| dme-miR-4968-3p*      | Supercontig_2.2         | 100                     | 16                            | 0                       | 0                      | 0.048               | 32.2                   | <i>C.neoformans/S. cerevisiae</i>             |                        |
| dme-miR-4968-3p*      | Supercontig_2.2         | 100                     | 16                            | 0                       | 0                      | 0.048               | 32.2                   | <i>C.neoformans/S. cerevisiae</i>             |                        |
| dme-miR-4968-3p*      | Supercontig_2.2         | 100                     | 16                            | 0                       | 0                      | 0.048               | 32.2                   | <i>C.neoformans/S. cerevisiae</i>             |                        |
| dme-miR-4968-3p*      | Supercontig_2.2         | 100                     | 16                            | 0                       | 0                      | 0.048               | 32.2                   | <i>C.neoformans/S. cerevisiae</i>             |                        |
| dme-miR-4968-3p*      | Supercontig_2.2         | 100                     | 17                            | 0                       | 0                      | 0.012               | 34.2                   | <i>C.neoformans/S. cerevisiae</i>             |                        |
| dme-miR-4968-3p*      | Supercontig_2.2         | 100                     | 18                            | 0                       | 0                      | 0.003               | 36.2                   | <i>C.neoformans/S. cerevisiae</i>             |                        |
| dme-miR-4968-3p*      | Supercontig_2.2         | 100                     | 18                            | 0                       | 0                      | 0.003               | 36.2                   | <i>C.neoformans/S. cerevisiae</i>             |                        |
| dme-miR-4968-3p*      | Supercontig_2.2         | 100                     | 18                            | 0                       | 0                      | 0.003               | 36.2                   | <i>C.neoformans/S. cerevisiae</i>             |                        |
| dme-miR-4968-3p*      | Supercontig_2.2         | 100                     | 18                            | 0                       | 0                      | 0.003               | 36.2                   | <i>C.neoformans/S. cerevisiae</i>             |                        |
| dme-miR-4968-3p*      | Supercontig_2.2         | 100                     | 18                            | 0                       | 0                      | 0.003               | 36.2                   | <i>C.neoformans/S. cerevisiae</i>             |                        |
| dpe-miR-13a           | Supercontig_2.11        | 100                     | 16                            | 0                       | 0                      | 0.048               | 32.2                   | <i>C.neoformans</i>                           |                        |
| dps-miR-2565-5p       | Supercontig_2.3         | 100                     | 16                            | 0                       | 0                      | 0.048               | 32.2                   | <i>S. cerevisiae</i>                          |                        |
| dps-miR-968-3p*       | Supercontig_2.3         | 100                     | 16                            | 0                       | 0                      | 0.06                | 32.2                   | <i>C. albicans</i>                            |                        |
| dre-miR-216a          | Supercontig_2.18        | 100                     | 17                            | 0                       | 0                      | 0.012               | 34.2                   | <i>C. albicans</i>                            |                        |
| dwi-miR-13a           | Supercontig_2.11        | 100                     | 16                            | 0                       | 0                      | 0.048               | 32.2                   | <i>C. albicans</i>                            |                        |
| gga-miR-1457          | Supercontig_2.2         | 100                     | 16                            | 0                       | 0                      | 0.048               | 32.2                   | <i>C. albicans</i>                            |                        |
| gga-miR-1458          | Supercontig_2.1         | 100                     | 16                            | 0                       | 0                      | 0.042               | 32.2                   | <i>S. cerevisiae</i>                          |                        |
| gga-miR-1692          | Supercontig_2.1         | 100                     | 17                            | 0                       | 0                      | 0.009               | 34.2                   | <i>C. albicans/S. cerevisiae/C.neoformans</i> |                        |
| gga-miR-1692          | Supercontig_2.2         | 100                     | 17                            | 0                       | 0                      | 0.009               | 34.2                   | <i>C. albicans/S. cerevisiae/C.neoformans</i> |                        |
| gga-miR-1814          | Supercontig_2.12        | 100                     | 16                            | 0                       | 0                      | 0.036               | 32.2                   | <i>C.neoformans</i>                           |                        |
| gga-miR-29a-5p        | Supercontig_2.4         | 100                     | 17                            | 0                       | 0                      | 0.012               | 34.2                   | <i>C. albicans</i>                            |                        |
| gga-miR-3540          | Supercontig_2.5         | 100                     | 16                            | 0                       | 0                      | 0.048               | 32.2                   | <i>S. cerevisiae</i>                          |                        |
| gga-miR-466           | Supercontig_2.1         | 100                     | 17                            | 0                       | 0                      | 0.014               | 34.2                   | <i>C.neoformans</i>                           |                        |
| gga-miR-466           | Supercontig_2.11        | 100                     | 16                            | 0                       | 0                      | 0.054               | 32.2                   | <i>C.neoformans</i>                           |                        |
| gga-miR-466           | Supercontig_2.17        | 100                     | 16                            | 0                       | 0                      | 0.054               | 32.2                   | <i>C.neoformans</i>                           |                        |
| gga-miR-466           | Supercontig_2.3         | 100                     | 16                            | 0                       | 0                      | 0.054               | 32.2                   | <i>C.neoformans</i>                           |                        |
| gga-miR-466           | Supercontig_2.8         | 100                     | 16                            | 0                       | 0                      | 0.054               | 32.2                   | <i>C.neoformans</i>                           |                        |
| gra-miR482            | Supercontig_2.6         | 95                      | 20                            | 1                       | 0                      | 0.048               | 32.2                   | <i>C.neoformans</i>                           |                        |
| hsa-miR-320a          | Supercontig_2.9         | 100                     | 16                            | 0                       | 0                      | 0.048               | 32.2                   | <i>C. albicans</i>                            |                        |
| hsa-miR-3620-5p       | Supercontig_2.10        | 100                     | 18                            | 0                       | 0                      | 0.003               | 36.2                   | <i>C.neoformans/S. cerevisiae</i>             |                        |
| hsa-miR-3620-5p       | Supercontig_2.10        | 100                     | 19                            | 0                       | 0                      | 8.00E-04            | 38.2                   | <i>C.neoformans/S. cerevisiae</i>             |                        |
| hsa-miR-3620-5p       | Supercontig_2.10        | 100                     | 20                            | 0                       | 0                      | 2.00E-04            | 40.1                   | <i>C.neoformans/S. cerevisiae</i>             |                        |
| hsa-miR-3620-5p       | Supercontig_2.1         | 100                     | 17                            | 0                       | 0                      | 0.012               | 34.2                   | <i>C.neoformans/S. cerevisiae</i>             |                        |
| hsa-miR-3620-5p       | Supercontig_2.3         | 100                     | 16                            | 0                       | 0                      | 0.048               | 32.2                   | <i>C.neoformans/S. cerevisiae</i>             |                        |
| hsa-miR-3620-5p       | Supercontig_2.4         | 100                     | 17                            | 0                       | 0                      | 0.012               | 34.2                   | <i>C.neoformans/S. cerevisiae</i>             |                        |
| hsa-miR-3620-5p       | Supercontig_2.4         | 95.24                   | 21                            | 1                       | 0                      | 0.012               | 34.2                   | <i>C.neoformans/S. cerevisiae</i>             |                        |
| hsa-miR-3620-5p       | Supercontig_2.6         | 100                     | 18                            | 0                       | 0                      | 0.003               | 36.2                   | <i>C.neoformans/S. cerevisiae</i>             |                        |
| hsa-miR-3620-5p       | Supercontig_2.6         | 100                     | 19                            | 0                       | 0                      | 8.00E-04            | 38.2                   | <i>C.neoformans/S. cerevisiae</i>             |                        |
| hsa-miR-3925-5p       | Supercontig_2.2         | 100                     | 16                            | 0                       | 0                      | 0.048               | 32.2                   | <i>C. albicans</i>                            |                        |

| Query id <sup>a</sup> | Subject id <sup>b</sup> | % Identity <sup>c</sup> | Alignment length <sup>d</sup> | Mismatches <sup>e</sup> | Gap opens <sup>f</sup> | Evalue <sup>g</sup> | Bit score <sup>h</sup> | Fungi vesicle <sup>i</sup>        | Reference <sup>j</sup> |
|-----------------------|-------------------------|-------------------------|-------------------------------|-------------------------|------------------------|---------------------|------------------------|-----------------------------------|------------------------|
| hsa-miR-3976          | Supercontig_2.31        | 100                     | 16                            | 0                       | 0                      | 0.06                | 32.2                   | <i>C.neoformans</i>               |                        |
| hsa-miR-4507          | Supercontig_2.10        | 95                      | 20                            | 1                       | 0                      | 0.036               | 32.2                   | <i>C.neoformans/S. cerevisiae</i> |                        |
| hsa-miR-4507          | Supercontig_2.10        | 95                      | 20                            | 1                       | 0                      | 0.036               | 32.2                   | <i>C.neoformans/S. cerevisiae</i> |                        |
| hsa-miR-4507          | Supercontig_2.3         | 100                     | 16                            | 0                       | 0                      | 0.036               | 32.2                   | <i>C.neoformans/S. cerevisiae</i> |                        |
| hsa-miR-4507          | Supercontig_2.4         | 100                     | 17                            | 0                       | 0                      | 0.009               | 34.2                   | <i>C.neoformans/S. cerevisiae</i> |                        |
| hsa-miR-4507          | Supercontig_2.6         | 95                      | 20                            | 1                       | 0                      | 0.036               | 32.2                   | <i>C.neoformans/S. cerevisiae</i> |                        |
| hsa-miR-4539          | Supercontig_2.6         | 100                     | 16                            | 0                       | 0                      | 0.048               | 32.2                   | <i>C. albicans</i>                |                        |
| hsa-miR-5194          | Supercontig_2.11        | 100                     | 16                            | 0                       | 0                      | 0.048               | 32.2                   | <i>S. cerevisiae</i>              |                        |
| hsa-miR-5195-3p*      | Supercontig_2.4         | 100                     | 17                            | 0                       | 0                      | 0.011               | 34.2                   | <i>S. cerevisiae</i>              |                        |
| hsv2-miR-H13          | Supercontig_2.12        | 100                     | 16                            | 0                       | 0                      | 0.048               | 32.2                   | <i>S. cerevisiae</i>              |                        |
| mml-miR-938           | Supercontig_2.31        | 100                     | 16                            | 0                       | 0                      | 0.048               | 32.2                   | <i>C.neoformans</i>               |                        |
| mml-miR-938           | Supercontig_2.31        | 100                     | 16                            | 0                       | 0                      | 0.048               | 32.2                   | <i>C.neoformans</i>               |                        |
| mmu-let-7e-3p*        | Supercontig_2.2         | 100                     | 16                            | 0                       | 0                      | 0.048               | 32.2                   | <i>C. albicans/C.neoformans</i>   |                        |
| mmu-miR-1895          | Supercontig_2.10        | 95.24                   | 21                            | 1                       | 0                      | 0.012               | 34.2                   | <i>S. cerevisiae</i>              |                        |
| mmu-miR-1903          | Supercontig_2.12        | 100                     | 16                            | 0                       | 0                      | 0.048               | 32.2                   | <i>S. cerevisiae</i>              |                        |
| mmu-miR-1903          | Supercontig_2.2         | 100                     | 16                            | 0                       | 0                      | 0.048               | 32.2                   | <i>S. cerevisiae</i>              |                        |
| mmu-miR-1903          | Supercontig_2.3         | 100                     | 16                            | 0                       | 0                      | 0.048               | 32.2                   | <i>S. cerevisiae</i>              |                        |
| mmu-miR-1903          | Supercontig_2.3         | 100                     | 16                            | 0                       | 0                      | 0.048               | 32.2                   | <i>S. cerevisiae</i>              |                        |
| mmu-miR-1903          | Supercontig_2.4         | 100                     | 17                            | 0                       | 0                      | 0.012               | 34.2                   | <i>S. cerevisiae</i>              |                        |
| mmu-miR-1903          | Supercontig_2.7         | 100                     | 16                            | 0                       | 0                      | 0.048               | 32.2                   | <i>S. cerevisiae</i>              |                        |
| mmu-miR-297a-5p       | Supercontig_2.2         | 95.24                   | 21                            | 1                       | 0                      | 0.012               | 34.2                   | <i>C. albicans</i>                |                        |
| mmu-miR-297a-5p       | Supercontig_2.3         | 100                     | 16                            | 0                       | 0                      | 4.80E-02            | 32.2                   | <i>C. albicans</i>                |                        |
| mmu-miR-297a-5p       | Supercontig_2.3         | 100                     | 17                            | 0                       | 0                      | 1.20E-02            | 34.2                   | <i>C. albicans</i>                |                        |
| mmu-miR-339-5p        | Supercontig_2.3         | 100                     | 16                            | 0                       | 0                      | 5.40E-02            | 32.2                   | <i>C. albicans</i>                |                        |
| mmu-miR-383-3p*       | Supercontig_2.32        | 100                     | 16                            | 0                       | 0                      | 4.20E-02            | 32.2                   | <i>S. cerevisiae</i>              |                        |
| mmu-miR-383-3p*       | Supercontig_2.32        | 100                     | 16                            | 0                       | 0                      | 4.20E-02            | 32.2                   | <i>S. cerevisiae</i>              |                        |
| mmu-miR-383-3p*       | Supercontig_2.32        | 100                     | 16                            | 0                       | 0                      | 4.20E-02            | 32.2                   | <i>S. cerevisiae</i>              |                        |
| mmu-miR-383-3p*       | Supercontig_2.32        | 100                     | 16                            | 0                       | 0                      | 4.20E-02            | 32.2                   | <i>S. cerevisiae</i>              |                        |
| mmu-miR-383-3p*       | Supercontig_2.32        | 100                     | 16                            | 0                       | 0                      | 4.20E-02            | 32.2                   | <i>S. cerevisiae</i>              |                        |
| mmu-miR-383-3p*       | Supercontig_2.32        | 100                     | 16                            | 0                       | 0                      | 0.042               | 32.2                   | <i>S. cerevisiae</i>              |                        |
| mmu-miR-383-3p*       | Supercontig_2.8         | 100                     | 16                            | 0                       | 0                      | 0.042               | 32.2                   | <i>S. cerevisiae</i>              |                        |
| mmu-miR-383-3p*       | Supercontig_2.8         | 100                     | 16                            | 0                       | 0                      | 0.042               | 32.2                   | <i>S. cerevisiae</i>              |                        |
| mmu-miR-383-3p*       | Supercontig_2.8         | 100                     | 16                            | 0                       | 0                      | 0.042               | 32.2                   | <i>S. cerevisiae</i>              |                        |
| mmu-miR-466f-5p       | Supercontig_2.3         | 100                     | 18                            | 0                       | 0                      | 0.003               | 36.2                   | <i>C. albicans</i>                |                        |
| mmu-miR-466h-3p*      | Supercontig_2.1         | 100                     | 17                            | 0                       | 0                      | 0.008               | 34.2                   | <i>C.neoformans</i>               |                        |
| mmu-miR-466h-3p*      | Supercontig_2.11        | 100                     | 18                            | 0                       | 0                      | 0.002               | 36.2                   | <i>C.neoformans</i>               |                        |
| mmu-miR-466h-3p*      | Supercontig_2.2         | 100                     | 16                            | 0                       | 0                      | 0.03                | 32.2                   | <i>C.neoformans</i>               |                        |
| mmu-miR-466h-3p*      | Supercontig_2.3         | 100                     | 16                            | 0                       | 0                      | 0.03                | 32.2                   | <i>C.neoformans</i>               |                        |
| mmu-miR-466h-3p*      | Supercontig_2.3         | 100                     | 18                            | 0                       | 0                      | 0.002               | 36.2                   | <i>C.neoformans</i>               |                        |
| mmu-miR-466h-3p*      | Supercontig_2.6         | 100                     | 17                            | 0                       | 0                      | 0.008               | 34.2                   | <i>C.neoformans</i>               |                        |
| mmu-miR-466h-5p       | Supercontig_2.3         | 95                      | 20                            | 1                       | 0                      | 0.048               | 32.2                   | <i>C.neoformans</i>               |                        |
| mmu-miR-466h-5p       | Supercontig_2.6         | 100                     | 16                            | 0                       | 0                      | 0.048               | 32.2                   | <i>C.neoformans</i>               |                        |
| mmu-miR-466j          | Supercontig_2.1         | 100                     | 19                            | 0                       | 0                      | 9.00E-04            | 38.2                   | <i>S. cerevisiae</i>              |                        |
| mmu-miR-466j          | Supercontig_2.11        | 100                     | 16                            | 0                       | 0                      | 0.054               | 32.2                   | <i>S. cerevisiae</i>              |                        |
| mmu-miR-466j          | Supercontig_2.11        | 100                     | 16                            | 0                       | 0                      | 0.054               | 32.2                   | <i>S. cerevisiae</i>              |                        |
| mmu-miR-466j          | Supercontig_2.2         | 100                     | 17                            | 0                       | 0                      | 0.014               | 34.2                   | <i>S. cerevisiae</i>              |                        |



| Query id <sup>a</sup> | Subject id <sup>b</sup> | % Identity <sup>c</sup> | Alignment length <sup>d</sup> | Mismatches <sup>e</sup> | Gap opens <sup>f</sup> | Evalue <sup>g</sup> | Bit score <sup>h</sup> | Fungi vesicle <sup>i</sup>          | Reference <sup>j</sup> |
|-----------------------|-------------------------|-------------------------|-------------------------------|-------------------------|------------------------|---------------------|------------------------|-------------------------------------|------------------------|
| mmu-miR-466j          | Supercontig_2.3         | 100                     | 16                            | 0                       | 0                      | 0.054               | 32.2                   | <i>S. cerevisiae</i>                |                        |
| mmu-miR-466j          | Supercontig_2.3         | 100                     | 16                            | 0                       | 0                      | 0.054               | 32.2                   | <i>S. cerevisiae</i>                |                        |
| mmu-miR-466j          | Supercontig_2.3         | 100                     | 16                            | 0                       | 0                      | 0.054               | 32.2                   | <i>S. cerevisiae</i>                |                        |
| mmu-miR-466j          | Supercontig_2.3         | 100                     | 16                            | 0                       | 0                      | 0.054               | 32.2                   | <i>S. cerevisiae</i>                |                        |
| mmu-miR-466j          | Supercontig_2.3         | 100                     | 17                            | 0                       | 0                      | 0.014               | 34.2                   | <i>S. cerevisiae</i>                |                        |
| mmu-miR-466j          | Supercontig_2.3         | 100                     | 18                            | 0                       | 0                      | 0.003               | 36.2                   | <i>S. cerevisiae</i>                |                        |
| mmu-miR-466j          | Supercontig_2.3         | 100                     | 20                            | 0                       | 0                      | 2.00E-04            | 40.1                   | <i>S. cerevisiae</i>                |                        |
| mmu-miR-466j          | Supercontig_2.3         | 95.24                   | 21                            | 1                       | 0                      | 0.014               | 34.2                   | <i>S. cerevisiae</i>                |                        |
| mmu-miR-466k          | Supercontig_2.6         | 100                     | 16                            | 0                       | 0                      | 0.054               | 32.2                   | <i>C.neoformans/S. cerevisiae</i>   |                        |
| mmu-miR-466k          | Supercontig_2.8         | 100                     | 16                            | 0                       | 0                      | 0.054               | 32.2                   | <i>C.neoformans/S. cerevisiae</i>   |                        |
| mmu-miR-466k          | Supercontig_2.18        | 100                     | 16                            | 0                       | 0                      | 0.054               | 32.2                   | <i>C.neoformans/S. cerevisiae</i>   |                        |
| mmu-miR-466k          | Supercontig_2.3         | 100                     | 16                            | 0                       | 0                      | 0.054               | 32.2                   | <i>C.neoformans/S. cerevisiae</i>   |                        |
| mmu-miR-466k          | Supercontig_2.3         | 100                     | 16                            | 0                       | 0                      | 0.054               | 32.2                   | <i>C.neoformans/S. cerevisiae</i>   |                        |
| mmu-miR-466k          | Supercontig_2.3         | 100                     | 16                            | 0                       | 0                      | 0.054               | 32.2                   | <i>C.neoformans/S. cerevisiae</i>   |                        |
| mmu-miR-466k          | Supercontig_2.3         | 100                     | 16                            | 0                       | 0                      | 0.054               | 32.2                   | <i>C.neoformans/S. cerevisiae</i>   |                        |
| mmu-miR-466k          | Supercontig_2.4         | 100                     | 16                            | 0                       | 0                      | 0.054               | 32.2                   | <i>C.neoformans/S. cerevisiae</i>   |                        |
| mmu-miR-466k          | Supercontig_2.4         | 100                     | 16                            | 0                       | 0                      | 0.054               | 32.2                   | <i>C.neoformans/S. cerevisiae</i>   |                        |
| mmu-miR-466k          | Supercontig_2.5         | 100                     | 16                            | 0                       | 0                      | 0.054               | 32.2                   | <i>C.neoformans/S. cerevisiae</i>   |                        |
| mmu-miR-467a-3p*      | Supercontig_2.22        | 100                     | 16                            | 0                       | 0                      | 0.048               | 32.2                   | <i>S. cerevisiae</i>                |                        |
| mmu-miR-467a-3p*      | Supercontig_2.4         | 100                     | 16                            | 0                       | 0                      | 0.048               | 32.2                   | <i>S. cerevisiae</i>                |                        |
| mmu-miR-467a-3p*      | Supercontig_2.9         | 100                     | 16                            | 0                       | 0                      | 0.048               | 32.2                   | <i>S. cerevisiae</i>                |                        |
| mmu-miR-467g          | Supercontig_2.10        | 100                     | 18                            | 0                       | 0                      | 0.003               | 36.2                   | <i>C. albicans/ P. brasiliensis</i> |                        |
| mmu-miR-467g          | Supercontig_2.12        | 100                     | 17                            | 0                       | 0                      | 1.10E-02            | 34.2                   | <i>C. albicans/ P. brasiliensis</i> |                        |
| mmu-miR-467g          | Supercontig_2.16        | 100                     | 16                            | 0                       | 0                      | 4.20E-02            | 32.2                   | <i>C. albicans/ P. brasiliensis</i> |                        |
| mmu-miR-467g          | Supercontig_2.27        | 100                     | 16                            | 0                       | 0                      | 0.042               | 32.2                   | <i>C. albicans/ P. brasiliensis</i> |                        |
| mmu-miR-467g          | Supercontig_2.3         | 95                      | 20                            | 1                       | 0                      | 0.042               | 32.2                   | <i>C. albicans/ P. brasiliensis</i> |                        |
| mmu-miR-467g          | Supercontig_2.4         | 100                     | 16                            | 0                       | 0                      | 0.042               | 32.2                   | <i>C. albicans/ P. brasiliensis</i> |                        |
| mmu-miR-467g          | Supercontig_2.5         | 100                     | 18                            | 0                       | 0                      | 0.003               | 36.2                   | <i>C. albicans/ P. brasiliensis</i> |                        |
| mmu-miR-467g          | Supercontig_2.7         | 100                     | 17                            | 0                       | 0                      | 0.011               | 34.2                   | <i>C. albicans/ P. brasiliensis</i> |                        |
| mmu-miR-669f-3p*      | Supercontig_2.10        | 100                     | 16                            | 0                       | 0                      | 0.054               | 32.2                   | <i>S. cerevisiae</i>                |                        |
| mmu-miR-669f-3p*      | Supercontig_2.13        | 100                     | 16                            | 0                       | 0                      | 0.054               | 32.2                   | <i>S. cerevisiae</i>                |                        |
| mmu-miR-669f-3p*      | Supercontig_2.16        | 100                     | 17                            | 0                       | 0                      | 0.014               | 34.2                   | <i>S. cerevisiae</i>                |                        |
| mmu-miR-669f-3p*      | Supercontig_2.2         | 100                     | 16                            | 0                       | 0                      | 0.054               | 32.2                   | <i>S. cerevisiae</i>                |                        |
| mmu-miR-669f-3p*      | Supercontig_2.22        | 100                     | 16                            | 0                       | 0                      | 0.054               | 32.2                   | <i>S. cerevisiae</i>                |                        |
| mmu-miR-669f-3p*      | Supercontig_2.3         | 95                      | 20                            | 1                       | 0                      | 0.054               | 32.2                   | <i>S. cerevisiae</i>                |                        |
| mmu-miR-669f-3p*      | Supercontig_2.4         | 100                     | 16                            | 0                       | 0                      | 0.054               | 32.2                   | <i>S. cerevisiae</i>                |                        |
| mmu-miR-669f-3p*      | Supercontig_2.4         | 100                     | 18                            | 0                       | 0                      | 0.003               | 36.2                   | <i>S. cerevisiae</i>                |                        |
| mmu-miR-669f-3p*      | Supercontig_2.7         | 100                     | 16                            | 0                       | 0                      | 0.054               | 32.2                   | <i>S. cerevisiae</i>                |                        |
| mmu-miR-669f-3p*      | Supercontig_2.9         | 100                     | 16                            | 0                       | 0                      | 0.054               | 32.2                   | <i>S. cerevisiae</i>                |                        |
| mmu-miR-669f-3p*      | Supercontig_2.9         | 100                     | 16                            | 0                       | 0                      | 0.054               | 32.2                   | <i>S. cerevisiae</i>                |                        |
| mmu-miR-669f-5p       | Supercontig_2.11        | 100                     | 16                            | 0                       | 0                      | 0.06                | 32.2                   | <i>S. cerevisiae</i>                |                        |
| mmu-miR-669f-5p       | Supercontig_2.2         | 100                     | 17                            | 0                       | 0                      | 0.015               | 34.2                   | <i>S. cerevisiae</i>                |                        |
| mmu-miR-669f-5p       | Supercontig_2.3         | 100                     | 16                            | 0                       | 0                      | 0.06                | 32.2                   | <i>S. cerevisiae</i>                |                        |
| mmu-miR-669f-5p       | Supercontig_2.3         | 100                     | 16                            | 0                       | 0                      | 0.06                | 32.2                   | <i>S. cerevisiae</i>                |                        |
| mmu-miR-669f-5p       | Supercontig_2.3         | 100                     | 16                            | 0                       | 0                      | 0.06                | 32.2                   | <i>S. cerevisiae</i>                |                        |
| mmu-miR-669f-5p       | Supercontig_2.3         | 100                     | 16                            | 0                       | 0                      | 0.06                | 32.2                   | <i>S. cerevisiae</i>                |                        |
| mmu-miR-669f-5p       | Supercontig_2.3         | 100                     | 16                            | 0                       | 0                      | 0.06                | 32.2                   | <i>S. cerevisiae</i>                |                        |
| mmu-miR-669f-5p       | Supercontig_2.3         | 100                     | 17                            | 0                       | 0                      | 0.015               | 34.2                   | <i>S. cerevisiae</i>                |                        |

| Query id <sup>a</sup> | Subject id <sup>b</sup> | % Identity <sup>c</sup> | Alignment length <sup>d</sup> | Mismatches <sup>e</sup> | Gap opens <sup>f</sup> | Evalue <sup>g</sup> | Bit score <sup>h</sup> | Fungi vesicle <sup>i</sup>                        | Reference <sup>j</sup> |
|-----------------------|-------------------------|-------------------------|-------------------------------|-------------------------|------------------------|---------------------|------------------------|---------------------------------------------------|------------------------|
| mmu-miR-669f-5p       | Supercontig_2.3         | 100                     | 17                            | 0                       | 0                      | 0.015               | 34.2                   | <i>S. cerevisiae</i>                              |                        |
| mmu-miR-669f-5p       | Supercontig_2.3         | 100                     | 20                            | 0                       | 0                      | 2.00E-04            | 40.1                   | <i>S. cerevisiae</i>                              |                        |
| mmu-miR-669f-5p       | Supercontig_2.6         | 100                     | 16                            | 0                       | 0                      | 6.00E-02            | 32.2                   | <i>S. cerevisiae</i>                              |                        |
| mtr-miR5227           | Supercontig_2.1         | 100                     | 16                            | 0                       | 0                      | 0.048               | 32.2                   | <i>C. albicans</i>                                |                        |
| oan-miR-1346          | Supercontig_2.10        | 100                     | 16                            | 0                       | 0                      | 0.03                | 32.2                   | <i>C. neoformans</i>                              |                        |
| oan-miR-1351-3p*      | Supercontig_2.1         | 100                     | 16                            | 0                       | 0                      | 0.042               | 32.2                   | <i>S. cerevisiae/C. albicans/C. neoformans</i>    |                        |
| oan-miR-1418-5p       | Supercontig_2.3         | 100                     | 16                            | 0                       | 0                      | 0.042               | 32.2                   | <i>C. neoformans</i>                              |                        |
| oan-miR-1420e-5p      | Supercontig_2.3         | 100                     | 17                            | 0                       | 0                      | 0.014               | 34.2                   | <i>P. brasiliensis</i>                            |                        |
| oan-miR-1421n-2-5p    | Supercontig_2.1         | 100                     | 17                            | 0                       | 0                      | 0.012               | 34.2                   | <i>P. brasiliensis</i>                            |                        |
| oan-miR-1422q-5p      | Supercontig_2.7         | 100                     | 16                            | 0                       | 0                      | 0.048               | 32.2                   | <i>S. cerevisiae</i>                              |                        |
| osa-miR1438           | Supercontig_2.1         | 100                     | 16                            | 0                       | 0                      | 4.80E-02            | 32.2                   | <i>C. albicans</i>                                |                        |
| osa-miR1438           | Supercontig_2.1         | 100                     | 16                            | 0                       | 0                      | 4.80E-02            | 32.2                   | <i>C. albicans</i>                                |                        |
| osa-miR1438           | Supercontig_2.5         | 100                     | 16                            | 0                       | 0                      | 4.80E-02            | 32.2                   | <i>C. albicans</i>                                |                        |
| osa-miR1438           | Supercontig_2.9         | 100                     | 16                            | 0                       | 0                      | 4.80E-02            | 32.2                   | <i>C. albicans</i>                                |                        |
| osa-miR1438           | Supercontig_2.9         | 100                     | 17                            | 0                       | 0                      | 0.012               | 34.2                   | <i>C. albicans</i>                                |                        |
| osa-miR156k           | Supercontig_2.1         | 100                     | 16                            | 0                       | 0                      | 0.042               | 32.2                   | <i>S. cerevisiae</i>                              |                        |
| osa-miR156k           | Supercontig_2.8         | 100                     | 16                            | 0                       | 0                      | 0.042               | 32.2                   | <i>S. cerevisiae</i>                              |                        |
| osa-miR2921           | Supercontig_2.14        | 100                     | 16                            | 0                       | 0                      | 0.06                | 32.2                   | <i>C. neoformans</i>                              |                        |
| osa-miR2921           | Supercontig_2.46        | 100                     | 16                            | 0                       | 0                      | 0.06                | 32.2                   | <i>C. neoformans</i>                              |                        |
| osa-miR399c           | Supercontig_2.3         | 100                     | 16                            | 0                       | 0                      | 0.042               | 32.2                   | <i>C. neoformans</i>                              |                        |
| osa-miR5144-5p        | Supercontig_2.17        | 100                     | 16                            | 0                       | 0                      | 0.042               | 32.2                   | <i>C. neoformans/S. cerevisiae</i>                |                        |
| osa-miR821c           | Supercontig_2.12        | 95                      | 20                            | 1                       | 0                      | 0.06                | 32.2                   | <i>P. brasiliensis</i>                            |                        |
| osa-miR821c           | Supercontig_2.4         | 100                     | 16                            | 0                       | 0                      | 0.06                | 32.2                   | <i>P. brasiliensis</i>                            |                        |
| pab-miR482d           | Supercontig_2.1         | 100                     | 16                            | 0                       | 0                      | 0.042               | 32.2                   | <i>S. cerevisiae</i>                              |                        |
| pma-miR-130e          | Supercontig_2.3         | 100                     | 16                            | 0                       | 0                      | 0.054               | 32.2                   | <i>P. brasiliensis</i>                            |                        |
| pma-miR-20a-5p        | Supercontig_2.3         | 100                     | 17                            | 0                       | 0                      | 0.014               | 34.2                   | <i>C. albicans/C. neoformans</i>                  |                        |
| ppt-miR1047-5p        | Supercontig_2.10        | 100                     | 16                            | 0                       | 0                      | 0.042               | 32.2                   | <i>P. brasiliensis</i>                            |                        |
| ppy-miR-1228          | Supercontig_2.7         | 100                     | 16                            | 0                       | 0                      | 0.036               | 32.2                   | <i>S. cerevisiae</i>                              |                        |
| rno-let-7e-3p*        | Supercontig_2.2         | 100                     | 16                            | 0                       | 0                      | 0.048               | 32.2                   | <i>C. albicans/C. neoformans</i>                  |                        |
| rno-miR-483-5p        | Supercontig_2.13        | 100                     | 16                            | 0                       | 0                      | 0.048               | 32.2                   | <i>C. neoformans</i>                              |                        |
| rno-miR-483-5p        | Supercontig_2.2         | 100                     | 16                            | 0                       | 0                      | 0.048               | 32.2                   | <i>C. neoformans</i>                              |                        |
| rno-miR-483-5p        | Supercontig_2.6         | 95.24                   | 21                            | 1                       | 0                      | 0.012               | 34.2                   | <i>C. neoformans</i>                              |                        |
| rno-miR-487b-5p       | Supercontig_2.3         | 100                     | 16                            | 0                       | 0                      | 0.054               | 32.2                   | <i>S. cerevisiae</i>                              |                        |
| sbi-miR821e           | Supercontig_2.4         | 100                     | 18                            | 0                       | 0                      | 0.003               | 36.2                   | <i>C. neoformans</i>                              |                        |
| sha-miR-23b           | Supercontig_2.11        | 100                     | 16                            | 0                       | 0                      | 0.03                | 32.2                   | <i>C. albicans</i>                                |                        |
| sme-miR-2149-5p       | Supercontig_2.2         | 100                     | 16                            | 0                       | 0                      | 0.042               | 32.2                   | <i>C. neoformans</i>                              |                        |
| smo-miR1097           | Supercontig_2.2         | 100                     | 16                            | 0                       | 0                      | 0.042               | 32.2                   | <i>C. albicans</i>                                |                        |
| ssc-miR-664-5p        | Supercontig_2.2         | 100                     | 16                            | 0                       | 0                      | 0.054               | 32.2                   | <i>P. brasiliensis</i>                            |                        |
| tgu-miR-200a-5p       | Supercontig_2.26        | 95                      | 20                            | 1                       | 0                      | 0.042               | 32.2                   | <i>C. albicans/S. cerevisiae</i>                  |                        |
| tgu-miR-2976          | Supercontig_2.11        | 100                     | 16                            | 0                       | 0                      | 0.042               | 32.2                   | <i>C. albicans/C. neoformans/ P. brasiliensis</i> |                        |
| vvi-miR3631c          | Supercontig_2.7         | 100                     | 17                            | 0                       | 0                      | 0.012               | 34.2                   | <i>C. neoformans/S. cerevisiae</i>                |                        |
| vvi-miR3631d          | Supercontig_2.7         | 100                     | 17                            | 0                       | 0                      | 0.012               | 34.2                   | <i>S. cerevisiae/ P. brasiliensis</i>             |                        |

a) Identifier of the microRNAs;

b) Sequence;

c) Percent of the identity between the sequences;

d) Size of alignment between the sequences of microRNAs and the genome region of *P. brasiliensis* (Pb18);

e) Number of different bases between the aligned sequences;

f) Absence of complementary bases between the sequences;

g) Likelihood sequence analyzed to align randomly to other sequences in the database. false positive rate;

- h) Normalized score obtained using the following formula:  $S' = (I S - \ln K) / \ln 2$ ;
- i) Microorganism which microRNAs have been described;
- j) Article describing microRNAs in fungi vesicles; (\*) microRNA star.
